1 **Title page**

2

3 **1. Title:** Translocation of chloroplast NPR1 to the nucleus in retrograde signaling for  
4 adaptive response to salt stress in tobacco

5 **2. Authors:** So Yeon Seo, Ky Young Park\*

6

7 **3. Affiliations:** Department of Biology, Suncheon National University, Suncheon,  
8 Chonnam 57922, Republic of Korea

9

10 **4. Contact Information:**

11 - **Corresponding Author** Ky Young Park, plpm@suncheon.ac.kr

12

13 **5. Short Title:** NPR1 in chloroplast retrograde signaling

14

15

16

17

18

19

20

21

## 22 **Abstract**

23

24 Chloroplasts play a pivotal role in biotic and abiotic stress responses, accompanying  
25 changes in the cell reduction/oxidation (redox) state. Chloroplasts are an  
26 endosymbiotic organelle that sends retrograde signals to the nucleus to integrate  
27 with environmental changes. This study showed that salt stress causes the rapid  
28 accumulation of the nonexpressor of pathogenesis-related genes 1 (NPR1) protein,  
29 a redox-sensitive transcription coactivator that elicits many tolerance responses in  
30 chloroplasts and the nucleus. The transiently accumulated chloroplast NPR1 protein  
31 was translocated to the nucleus in a redox-dependent manner under salinity stress.  
32 In addition, immunoblotting and fluorescence image analysis showed that  
33 chloroplast-targeted NPR1-GFP fused with cTP (chloroplast transit peptide from  
34 RbcS) was localized in the nucleus during the responses to salt stress. Chloroplast  
35 functionality was essential for retrograde translocation, in which the stomules and  
36 cytoplasmic vesicles participated. Treatments with H<sub>2</sub>O<sub>2</sub> and an ethylene precursor  
37 enhanced this retrograde translocation. Compared to each wild-type plant,  
38 retrograde signaling-related gene expression was severely impaired in the *npr1-1*  
39 mutant in Arabidopsis, but enhanced transiently in the *NPR1-Ox* transgenic tobacco  
40 line. Therefore, NPR1 might be a retrograde signaling hub that improves a plant's  
41 adaptability to changing environments.

42

43

## 44 **Introduction**

45 How organelles communicate with the nucleus to coordinate genetic programs and  
46 cellular functions is a fundamental question of plant physiology and cell biology  
47 (Pfannschmidt et al., 2020). Reduction/oxidation (redox)-associated signaling is an  
48 essential component of responses to environmental stresses and pathogen attack in  
49 all organisms, including plants (Munné-Bosch et al., 2013), in which stress-related  
50 reactive oxygen species (ROS) and redox information are principally accumulated in  
51 chloroplasts. Disturbance to photosynthetic activity in chloroplasts under  
52 environmental stresses or pathogen attack creates an oxidative environment,  
53 facilitating signaling by oxidation of protein cysteine residues (van der Reest et al.,

54 2018). Therefore, ROS-sensitive proteins function as redox switches in response to  
55 abiotic/biotic stress. It was recently reported that a ROS-mediated redox cascade is  
56 involved in communication between chloroplasts and the nucleus through retrograde  
57 signaling, resulting in protective mechanisms and modulation of hormone  
58 biosynthesis (Chan et al., 2016; Müllineaux et al., 2020). Although retrograde signals  
59 from chloroplasts to the nucleus for adaptive responses during chloroplast  
60 development and under environmental stresses have been explored recently, the  
61 translocation mechanism of metabolites or proteins is still poorly understood.  
62 Proteins with redox-sensitive cysteine residues may function as redox sensors and  
63 retrograde signaling switches through redox-sensitive post-translational  
64 modifications (PTM) (Smirnov and Arnaud, 2019; Mata-Pérez and Spoel, 2019).

65 The nonexpressor of pathogenesis-related genes 1 (NPR1) protein is a  
66 transcription coactivator and a master regulator of plant immunity with salicylic acid  
67 (SA)-mediated defense responses and systemic acquired resistance (SAR) in  
68 *Arabidopsis* (Mou et al., 2003). NPR1 proteins sense cytoplasmic changes in SA-  
69 dependent redox status during innate immune responses (Tada et al., 2008).  
70 Pathogen-induced SA triggers alteration of the cellular reduction potential, thereby  
71 reducing the cytoplasmic NPR1 tetramer into a monomer via breakage of disulfide  
72 bonds, after which the NPR1 monomer is imported into the nucleus to function as a  
73 coactivator of gene transcription in SAR (Spoel et al., 2009). On the basis of our  
74 previous results, although NPR1 is a transcriptional coactivator, a large amount of  
75 NPR1 is present in the chloroplasts under salt stress (Seo et al., 2020).

76

77

## 78 **Results**

### 79 **Translocation of NPR1 from chloroplasts to the nucleus under salt stress**

80 In a previous study, we generated stable transgenic tobacco plants expressing a  
81 fusion construct of full-length *NPR1* combined with the green fluorescent protein  
82 (*GFP*) driven by a 0.8-kb region of the *NPR1* promoter (*pNPR1::NPR1-GFP*) or the  
83 *CaMV 35S* nuclear promoter (*p35S::NPR1-GFP*) (Seo et al., 2020). With increase in  
84 salt concentration, translocation of NPR1 to the chloroplasts under salt stress  
85 increased significantly (Supplemental Figure 1A and 1B). In the present study, we

86 further investigated the cellular partitioning of NPR1 under salt stress using a  
87 confocal laser scanning microscope (STELLARIS 8; LEICA, Germany). Peak NPR1-  
88 GFP fluorescence in chloroplasts was observed at 12 h, then declined rapidly to  
89 similar to the initial intensity at 24 h, whereas fluorescence was strongly observed in  
90 the nucleus at 24 h, in tobacco mesophyll protoplasts of *pNPR1::NPR1-GFP*  
91 transformants under salt stress (Figure 1A and Supplemental Movie1). We noted that  
92 a large amount of NPR1 was present in the nucleus at the time that NPR1  
93 disappeared from the chloroplast after 24 h of salt stress, hence additional  
94 experiments were performed to further explore this relationship. In particular, we  
95 investigated whether NPR1 in the nucleus is imported from the cytoplasm or whether  
96 chloroplast NPR1 is translocated to the nucleus. Notably, NPR1-GFP vesicles of  
97 various sizes were observed in the cytoplasm at 6 h under salt stress (Figure 1B).  
98 Cytoplasmic NPR1 condensates are observed in Arabidopsis leaves after treatment  
99 with SA, which performs an essential function in mediating protein homeostasis and  
100 cell survival during the plant immune response (Zavaliev et al., 2020). Therefore, we  
101 investigated the function of cytoplasmic NPR1 vesicles in salt-stressed tobacco  
102 leaves.

103 Although Arabidopsis NPR1 is predominantly sequestered in the cytoplasm as a  
104 high-molecular-weight oligomeric complex, upon pathogen infection the cellular  
105 reduction potential is changed by cytoplasmic SA and thioredoxin, which results in  
106 partial reduction of the NPR1 oligomer to a monomer and its translocation to the  
107 nucleus where it functions as a coactivator of TGA transcription factors (Després et  
108 al., 2003). However, tobacco NPR1 was rapidly imported into chloroplasts after  
109 pathogen infection with *Phytophthora parasitica* var. *nicotianae*, which was followed  
110 by NPR1 translocation to the nucleus (Supplemental Figure 1C and 1D). These  
111 results implied that tobacco NPR1 undergoes an intermediate process in which  
112 NPR1 is transiently sequestered in chloroplasts during the resistance response to  
113 virulent pathogens. Chloroplasts are organelles that produce large amounts of ROS  
114 in the early stages of stresses, thus redox-sensitive chloroplast proteins are ideal  
115 candidates as redox sensors or signaling molecules. In this proposed mechanism,  
116 chloroplasts determine the current environmental state and produce diverse signals  
117 informing the nucleus about the functionality of the photosynthetic apparatus, which

118 is defined as retrograde signaling (Pfalz et al., 2012).

119 In the response to salt stress, tobacco NPR1 was gradually localized in the  
120 chloroplasts, and at the same time, many vesicles gradually developed around the  
121 chloroplasts at 6 h (Figure 1B). After 24 h of salt stress, NPR1 was localized  
122 predominantly in and around the nucleus and the cytoplasm (Figure 1C). When the  
123 blue nuclear fluorescence from DAPI staining was merged with the green-fluorescent  
124 NPR1 signal, the blue-green signal was clearly apparent, suggesting that NPR1 was  
125 localized in the nucleus (Figure 1C, upper panel). In the merged images, the green  
126 band surrounding the sky-blue region indicated that NPR1 was localized in the  
127 perinuclear region. Interestingly, the observations implied that a large amount of  
128 NPR1-GFP was clustered around the nucleus. The rapid movement of vesicle-like  
129 structures containing NPR1 was also observed in mesophyll protoplasts under salt  
130 stress (Supplemental Movie 2). Considering the temporal changes in subcellular  
131 localization, perinuclear aggregation of NPR1-GFP suggests that NPR1 likely exits  
132 the chloroplasts and approaches the nucleus during the stress response. Taken  
133 together, these observations implied that NPR1 may be involved in chloroplast-to-  
134 nucleus retrograde signaling.

135 To further investigate whether NPR1 moves from chloroplasts to the nucleus, the  
136 *pNPR1::NPR1-GFP* transformant was subjected to salt stress and movement of  
137 NPR1-GFP protein in guard cells of the leaf was explored using a fluorescence  
138 microscope (Thunder Imager, LEICA, Germany). Surprisingly, NPR1 vesicles  
139 approaching the nucleus proceeded to fuse with the nucleus, and then NPR1-GFP  
140 fluorescence rapidly disappeared, which indicated that the NPR1 protein was  
141 imported into the nucleus (Figure 1D and Supplemental Movie 3). Although stress-  
142 induced retrograde signaling pathways involving chlorophyll intermediates, ROS,  
143 metabolites, and transcription factors in chloroplast-to-nucleus communication have  
144 recently been identified, the molecular machineries of such retrograde signaling  
145 pathways are incompletely understood (Chan et al., 2016). The present study  
146 presents the first observation that proteins are released from chloroplasts in vesicle-  
147 like structures and directly access the nucleus during the stress response, although  
148 the direct transfer of H<sub>2</sub>O<sub>2</sub> and SA through stromules or chloroplast–nucleus  
149 complexes has been observed previously (Exposito-Rodriguez et al., 2017; Caplan,

150 2015).

151 Next, we examined whether NPR1 translocation to the nucleus is affected by  
152 altering chloroplast conditions, in which the chloroplast NPR1 abundance is  
153 dependent on its oxidative status (Seo et al., 2020). We previously reported that  
154 plant cells under salt stress rapidly up-regulated the redox-sensitive NPR1 protein,  
155 which is imported to chloroplasts for induction of protective responses as  
156 chaperones and antioxidants with lower chloroplastic ROS accumulation.

157 The compounds 3-(3,4-dichlorophenyl)-1,1-dimethylurea (DCMU) and 2,5-  
158 dibromo-3-methyl-6-isopropylbenzoquinone (DBMIB) inhibit the photosynthetic  
159 electron transport chain in photosystem II (PSII) (Mühlenbock et al., 2008). DCMU  
160 increases the pool of oxidized plastoquinone (PQ), whereas DBMIB increases the  
161 pool of reduced PQ. Under co-treatment with salt stress, DCMU almost completely  
162 inhibited NPR1 accumulation in the nucleus, but DBMIB caused weak inhibition, in  
163 comparison with stress alone (Figure 1E). Based on the finding that DCMU  
164 completely blocked ROS accumulation in the chloroplast stroma (Exposito-  
165 Rodriguez et al., 2017), it was concluded that DCMU completely prevented NPR1  
166 import to the nucleus because ROS were not produced in the chloroplasts.

167 Next, diphenyleneiodonium (DPI), an inhibitor of NADPH oxidase activity (Seo et  
168 al., 2020), was administered to leaves of *p35S::NPR1-GFP* transgenic plants under  
169 salt stress. The DPI-dependent inhibition of NADPH oxidase activity resulted in  
170 reduction of its products, including ROS, in chloroplasts and other cellular  
171 compartments. As expected, DPI treatment completely prevented NPR1  
172 accumulation in the nucleus (Figure 1E). Lincomycin (LIN), a translation inhibitor in  
173 chloroplasts (Kim and Mullet, 2003), significantly reduced the amount of nuclear  
174 NPR1 (Figure 1E). Norflurazone, a compound inducing strong photo-oxidation and  
175 subsequent plastid dysfunction (Park et al., 2017), caused prominent nuclear NPR1  
176 accumulation in leaf protoplasts (Figure 1E). This result suggested that norflurazone-  
177 induced photo-oxidation enhanced the translocation of NPR1 to the nucleus. Taken  
178 together, the changes in oxidative status and protein translation in chloroplasts might  
179 impact on the nuclear accumulation of NPR1 under stress.

180

181 **Changes in NPR1 translocation to the nucleus according to chloroplast**

182 **condition**

183 Next, we examined whether NPR1 targeted to chloroplasts migrates to the nucleus  
184 and affects stress tolerance. Only a small portion of the total chloroplast proteome,  
185 which lacks chloroplast transit peptides (cTP), is nucleus-encoded and synthesized  
186 on cytosolic ribosomes, and thus enters internal chloroplast compartments  
187 (Armbruster et al., 2009). Some non-cTP chloroplast proteins may be localized to the  
188 stroma through the endoplasmic reticulum (ER)-dependent chloroplast targeting  
189 pathway (Nanjo et al., 2006). Although tobacco NPR1 does not possess cTP and  
190 signal peptides, NPR1-GFP fluorescence was detected in chloroplast stroma, as  
191 evidenced by the yellow color in the merged image with chlorophyll autofluorescence  
192 (Figure 1A). To monitor the movement of chloroplast-targeted NPR1, we attached  
193 the *cTP* sequence (79 amino acid residues) of tobacco *RbcS* (GenBank accession  
194 AY220079) to the 5' end of *NPR1-GFP* to generate *p35S::cTP-NPR1-GFP*  
195 transgenic tobacco.

196 Surprisingly, chloroplast-targeted NPR1-GFP with cTP was observed in the  
197 nucleus of mesophyll cells and guard cells after salt stress (Figure 2A and 2B),  
198 implying that chloroplast NPR1 moved to the nucleus under salt stress, which can be  
199 referred to as retrograde communication. Relatively constant amounts of cTP-NPR1-  
200 GFP protein accumulated in chloroplasts of *p35S-driven cTP-NPR1-GFP* transgenic  
201 plants under salt stress, indicating that cTP-NPR1-GFP was constitutively imported  
202 into chloroplasts mediated by the transit peptide (Supplemental Figure 2A). Although  
203 NPR1 abundance was constitutively maintained in the chloroplasts, the cTP-  
204 attached NPR1 abundance was lower in the nucleus and peaked at 9 h of salt stress.  
205 These results implied that chloroplastic NPR1 was realistically translocated to the  
206 nucleus during the response to salt stress. LIN almost entirely blocked accumulation  
207 of nuclear NPR1, which is expected to originate from chloroplasts, in cTP-fused  
208 NPR1-GFP transgenic plants (Supplemental Figure 2B).

209 Furthermore, when exogenous H<sub>2</sub>O<sub>2</sub> or 1-amino-1-cyclopropane carboxylic acid  
210 (ACC), a precursor of ethylene, was applied to transgenic plants (*p35S::cTP-NPR1-*  
211 *GFP*), nuclear NPR1 increased significantly in mesophyll protoplasts (Figure 2C). In  
212 our previous study, H<sub>2</sub>O<sub>2</sub> and ACC application resulted in increased accumulation of  
213 chloroplast NPR1 in tobacco leaves (Seo et al., 2020). These results reinforced the



214 conclusion that NPR1 translocation from chloroplasts to the nucleus is dependent on  
215 the ROS concentration in plants. In particular, LIN almost completely blocked NPR1  
216 accumulation in the nucleus, despite treatment with H<sub>2</sub>O<sub>2</sub> or ACC with salt stress  
217 (Figure 2D). These results further confirmed the involvement of chloroplasts in  
218 nuclear NPR1 abundance under salt stress. Taken together, it is implied that  
219 chloroplast-to-nucleus translocation of NPR1 is required for chloroplast functionality  
220 with protein translation.

221 To further investigate the role of chloroplasts in NPR1 translocation to the  
222 nucleus, we determined NPR1 subcellular localization in leaf epidermal pavement  
223 cells and root of tobacco, where small chloroplasts or leucoplasts were present,  
224 respectively (Brunkard et al., 2015). Native *pNPR1*-driven NPR1-GFP was  
225 significantly accumulated in the plasma membrane, cytoplasm, and nucleus of the  
226 pavement cells in the leaf abaxial epidermis of tobacco transgenic plants after salt  
227 stress for 6 h (Figure 2E). Although weak NPR1-GFP fluorescence was detected in  
228 untreated transgenic plants, relatively high-intensity fluorescence was observed after  
229 stress treatment, which was suggested to be newly induced by salt stress. In  
230 particular, NPR1-GFP formed cytoplasmic vesicles of various sizes, which were  
231 dispersed in the cytoplasm at 6 h of salt stress, but had almost disappeared at 24 h.

232 Our observation of minute cytoplasmic bodies in the tobacco leaf epidermal  
233 pavement cells after 6 h of 1 mM SA treatment (Figure 2E) was consistent with a  
234 previous report that NPR1-GFP bodies were detected in the cytoplasm and nucleus  
235 in *Arabidopsis* after treatment with 5 mM SA for 2 h using a transient expression  
236 assay (Zavaliev et al., 2020). The NPR1 bodies were designated SA-induced NPR1  
237 condensates, which are enriched with defense- and stress-associated proteins and  
238 ubiquitination components, such as CUL3. The NPR1-CUL3 condensates are  
239 suggested to perform functions in SA-induced regulation of protein homeostasis. In  
240 our previous report, it was revealed that cytoplasmic NPR1 shows chaperone activity  
241 under salt stress (Seo et al., 2020). Therefore, it is considered that formation of  
242 NPR1 condensates is correlated with the chaperone activity of cytoplasmic NPR1. In  
243 the present study, NPR1 bodies of various sizes were observed in the cytoplasm at 6  
244 h of salt stress and SA treatment, after which they were almost undetectable, and  
245 NPR1 was predominantly observed in the nucleus and plasma membrane at 24 h of



246 salt stress and SA treatment. The minute bodies were considered to be NPR1  
247 condensates, whereas some of the larger bodies were considered to be cytoplasmic  
248 vesicles. However, the low abundance of cTP-fused NPR1 was not changed visibly  
249 in leaf epidermal pavement cells in response to salt stress (Figure 2E, lower panel).  
250 Taken together, these results indicated that NPR1 condensate abundance differed  
251 according to the status of chloroplasts and may reinforce the contention that NPR1 is  
252 imported into chloroplasts during the stress response.

253 Although cTP-attached NPR1-GFP (cTP-NPR1-GFP) was strongly accumulated  
254 only in the cytoplasm of cells in the root elongation zone (EZ) of transgenic plants  
255 constitutively expressing *cTP-NPR1-GFP* under salt stress, *pNPR1*-driven NPR1-  
256 GFP without cTP was significantly accumulated in the nucleus in cells of the  
257 meristematic zone (MZ) and EZ of roots (Figure 2F, Supplemental Figure 2C and 2D).  
258 These results implied that NPR1-GFP was translocated from the cytoplasm to the  
259 nucleus in roots during the stress response regardless of chloroplast functionality,  
260 but cTP-fused NPR1 (cTP-NPR1-GFP) was not translocated to the nucleus and  
261 instead remained in the cytoplasm. Moreover, *p35S*-driven cTP-NPR1 was barely  
262 detected in the MZ of the root, suggesting that nonfunctional NPR1 with the transit  
263 peptide in the cytoplasm of MZ root cells may be completely degraded (Figure 2F). It  
264 was previously reported that nuclear-encoded RbcS with cTP was not imported into  
265 root plastids (Yan et al., 2006). Therefore, it can be assumed that cTP-NPR1, which  
266 could not migrate to the nucleus in root MZ or leaf epidermal pavement cells, is  
267 continuously degraded by proteolytic cleavage. Taken together, these results  
268 indicated that cTP presence interrupted the nuclear localization of NPR1, suggesting  
269 that the involvement of PTM in chloroplasts is required for chloroplast-to-nucleus  
270 signaling during the stress response.

271 Next, a transient assay was performed on tobacco protoplasts with a native  
272 *pNPR1*-driven construct in which *GFP* was fused to the N-terminus of *NPR1*.  
273 Although GFP was present at the N-terminus of NPR1, GFP-NPR1 fluorescence was  
274 strongly detected in the chloroplasts under salt stress, which showed the same  
275 pattern as NPR1-GFP (Supplemental Figure 3). However, GFP-NPR1 was not  
276 detected in the nucleus. Given GFP-NPR1 translocation only into the chloroplasts,  
277 this result indicated that NPR1 was imported into the chloroplasts independently of

278 the N-terminus of NPR1.

279 Maximal photochemical efficiency and trypan blue staining for cell death  
280 indicated that *p35S*-driven overexpression of *NPR1-GFP* resulted in greater  
281 tolerance to salt stress. Compared with the wild-type (WT), transgenic plants  
282 expressing *cTP-NPR1-GFP* or *NPR1-GFP* under salt stress showed enhanced  
283 maximal photochemical efficiency of PSII ( $F_v/F_m$ ) (Maruta et al., 2012) based on  
284 chlorophyll fluorescence measured using a PAM 2000 Photosynthesis Yield Analyzer  
285 (Walz, Germany) (Figure 3A).

286 Constitutive expression of *cTP-NPR1-GFP* more significantly reduced cell  
287 damage under salt stress compared with NPR1 without cTP (Fig 3B). However, in  
288 transgenic plants in which NPR1 was induced by native *pNPR1*, cell damage caused  
289 by salt stress was not notably different from that of WT plants. These results are  
290 associated with the functions of chloroplast-localized NPR1 as an antioxidant and a  
291 chaperone (Seo et al., 2020). *cTP-NPR1* driven by *p35S* may have been present in  
292 the chloroplast before stress treatment and was then moved to the nucleus after  
293 processing to remove cTP, and the action of NPR1 as a transcription coactivator may  
294 have caused expression of resistance-related proteins and antioxidant enzymes.  
295 Therefore, experiments focused on the mechanism by which NPR1 enhanced  
296 resistance to salt stress were performed.

297 We visualized *in vivo* ROS generation with 2',7'-dichlorofluorescein diacetate,  
298 which is a fluorogenic dye for cellular ROS including  $H_2O_2$ , and staining with nitro  
299 blue tetrazolium and diaminobenzidine for microscopic detection of  $O_2^{\cdot-}$  and  $H_2O_2$ ,  
300 respectively. In cells with increased expression of NPR1, ROS accumulation in the  
301 chloroplasts visibly decreased compared with that of the WT under salt stress  
302 (Figure 3C). In particular, the *cTP*-fused NPR1 further suppressed ROS  
303 accumulation, including  $O_2^{\cdot-}$  and  $H_2O_2$ , in whole leaves of transgenic plants under  
304 salt stress (Figure 3C). However, ROS accumulation increased visibly in the nucleus  
305 from the onset of salinity stress, peaked at 6 h, and thereafter decreased in WT and  
306 *pNPR1::NPR1-GFP* plants, but a high amount of ROS was maintained in the nucleus  
307 of guard cells in *p35S::cTP-NPR1-GFP* plants (Figure 3D). These results suggested  
308 that elevated content of NPR1 in chloroplasts more efficiently caused ROS/redox  
309 regulation of chloroplast–nucleus communication in *p35S::cTP-NPR1-GFP*

310 transformants. Elevated ROS up-regulates the expression of transcription factors  
311 and stress-related proteins in the nucleus, possibly enhancing stress tolerance.

312 The pattern for increase in the  $F_v/F_m$  ratio was consistent with the gene  
313 expression characteristics of chloroplastic components for photosynthesis in  
314 *p35S::cTP-NPR1-GFP* transgenic plants (Figure 3E). Hydrogen peroxide-triggered  
315 retrograde signaling from chloroplasts to the nucleus plays a specific role in  
316 response to abiotic stress (Hanson and Hines, 2018) and innate immunity (Caplan,  
317 2015). The present results also suggested that chloroplast NPR1 is a prerequisite for  
318 nuclear NPR1, which might be dependent on the oxidative status of chloroplasts. To  
319 elucidate the physiological functions of nuclear NPR1 in response to salt stress, we  
320 compared the transcription patterns of nuclear-encoded genes for photosynthesis-  
321 related proteins among WT and transgenic plants (*p35S::NPR1-GFP* and  
322 *p35S::cTP-NPR1-GFP*) upon salt stress. Real-time quantitative RT-PCR (qRT-PCR)  
323 was performed on the genes encoding RubisCO and core complex and antenna  
324 proteins of PS I and II. The transcript levels in transgenic plants compared with those  
325 in the WT were higher in almost all genes at 3 h and 12 h after salt stress (Figure  
326 3E). In particular, transcript ratios for *p35S::cTP-NPR1-RFP* to WT increased  
327 significantly in all tested nuclear-encoded genes after 12 h of salt stress, when the  
328 NPR1-GFP protein was prominently localized in the nucleus (Figure 2A and 2B).

329 NPR1 is controlled by the nuclear localization sequence (NLS) at the C-terminus  
330 and functions as a transcription coactivator in the nucleus (Després et al., 2003). The  
331 NLS region at the C-terminus of NPR1 was deleted, after which a mutated construct,  
332 *p35S::NPR1( $\Delta$ nls)-GFP*, was transiently co-expressed with *p35S::NPR1-cyan*  
333 *fluorescent protein (CFP)* in mesophyll protoplasts isolated from WT tobacco plants.  
334 To investigate NPR1 translocation from chloroplasts to the nucleus after salt stress,  
335 two *p35S*-driven variants [NPR1-CFP and NPR1( $\Delta$ nls)-GFP] were used. The GFP or  
336 CFP fluorescence intensity was determined under salt stress after transient co-  
337 expression in leaf protoplasts (Figure 4A). The intensity of NPR1-CFP fluorescence  
338 in the chloroplasts peaked at 6 h and thereafter gradually decreased. In particular,  
339 vesicles containing only NPR1-CFP were observed around the chloroplasts, which  
340 resembled chloroplast protrusions (Figure 4B). However, NPR1( $\Delta$ nls)-GFP  
341 fluorescence intensity continuously increased in chloroplasts until 36 h (Figure 4C).

342 Chloroplast NPR1-GFP from this construct without the NLS was maintained at a  
343 much higher level compared with that of the *NPR1-CFP* construct with the NLS  
344 (Supplemental Figure 4). These results suggested that stress-induced export of  
345 NPR1 from chloroplasts was dependent with the NLS.

346 Next, we investigated translocation vehicles that chloroplast NPR1 proteins  
347 translocate to the nucleus. In the experimental system under salt stress, rapidly  
348 moving vesicles emitting GFP fluorescence were observed in guard cells (Figure 1D  
349 and Supplemental Movie 3) and mesophyll cells (Supplemental Movie 2). In  
350 particular, rapid movement of vesicles containing NPR1-GFP molecules was  
351 observed around intact chloroplasts and in the perinuclear region of protoplasts from  
352 salt-stressed mesophyll cells (Figure 1B), suggesting intracellular trafficking of  
353 NPR1-GFP to the nucleus. Protrusions and vesicles from chloroplast bodies showed  
354 GFP fluorescence in isolated chloroplasts from leaves of salt-stressed *p35S::cTP-*  
355 *NPR1-GFP* tobacco transformants (Figure 4D).

356 These narrow, tiny structures were considered to be stromules, which are  
357 stroma-containing tubules that emanate from the main chloroplast body *in vivo*  
358 (Caplan, 2015). Stromules emanate from plastids at varying frequencies, which differ  
359 among environmental conditions and cell types (Ritzenthaler et al., 2002). Proteins,  
360 ROS, and other molecules flow through stromules, which might transport retrograde  
361 signaling molecules from chloroplasts to the nucleus (Caplan, 2015). Stromules may  
362 be a source of plastid-derived vesicles for signaling of environmental stimuli or for  
363 recycling of chloroplast contents (Ritzenthaler et al., 2002). We detected many  
364 fluorescent vesicles containing NPR1-GFP molecules in response to salt stress in  
365 leaves of tobacco overexpressing NPR1-GFP (Figure 1B and 1C). Although the  
366 precise role of stromule-derived vesicles or stromule-related chloroplast protrusions  
367 is unknown, they are suggested to play an important role in translocation of signaling  
368 components from chloroplasts to the nucleus.

369 Brefeldin A, which disrupts ER- and Golgi-mediated vesicular trafficking (Selga et  
370 al., 2010), reduced vesicle movement accompanied by significant reduction of  
371 NPR1-GFP fluorescence intensity in the nucleus under salt stress (Figure 4E).  
372 Therefore, stromule-derived vesicles may function as vehicles of NPR1 during  
373 chloroplast retrograde signaling by plastid–nuclear complexes through Golgi bodies,

374 ER, and the nuclear envelope (Brigelius-Flohé and Flohé, 2011).

375 For ROS to affect gene expression, the oxidization of cysteine residues may  
376 modify the protein structure, resulting in larger oxidation products with disulfide  
377 bonds, or change enzymatic activity for production of signaling metabolites (van  
378 Eerden et al., 2017). The molecular weights of NPR1-GFP proteins of various sizes,  
379 including oligomeric forms >400 kDa, a tetrameric form, and a dimeric form were  
380 significantly and rapidly increased in chloroplast stroma proteins from leaves of salt-  
381 stressed *pNPR1::NPR1-GFP* and *p35S::cTP-NPR1-GFP* transformants (Figure 5A).  
382 In particular, the abundance of oligomers smaller than tetramers was significantly  
383 increased, suggesting that redox-sensitive NPR1 was converted to more reduced  
384 forms due to conformational changes in response to salt stress. Considering that  
385 cytosolic thioredoxins directly catalyze the NPR1 oligomer-to-monomer reaction  
386 (Tada et al., 2008), it is possible that stress-induced redox regulators markedly  
387 facilitated dimerization of NPR1 in chloroplasts, which was a more advantageous  
388 form to move. Only monomeric NPR1-GFP was detected in the nuclear fraction of  
389 *pNPR1::NPR1-GFP* transformants, which were maintained at significant levels at 6  
390 to 48 h under salt stress (Figure 5B). Taken together, it is implied that translocation of  
391 chloroplast-localized NPR1 to the nucleus conveyed signals from the stressed  
392 chloroplasts and that NPR1 might be involved in retrograde chloroplast-to-nucleus  
393 signaling.

394 It is surprising that NPR1-GFP protein with a size of about 45 kDa (~18 kDa in  
395 the C-terminal region of NPR1 and 27 kDa GFP), which has been designated CP45  
396 (Seo et al., 2020), was detected in the nucleus (Supplemental Figure 5A and 5B).  
397 More importantly, nuclear CP45 was detected not only in NPR1-GFP transgenic  
398 plants, but also especially in plants expressing cTP-NPR1-GFP by non-reduced  
399 immunoblot analysis using a GFP antibody. The amounts of CP45 were significantly  
400 increased in the nuclear protein fraction after treatment with the proteasome  
401 inhibitors MG115 and MG132. These results indicated that the 45-kDa protein was  
402 regulated by proteasome-dependent degradation in the nucleus.

403 Using western blot analysis with an ubiquitin antibody after immunoprecipitation  
404 with a GFP antibody, we detected ubiquitinated NPR1 of the monomer and CP45 in  
405 the nuclear fraction of salt-stressed *p35S::cTP-NPR1-GFP* transgenic plants

406 (Supplemental Figure 5C). These results confirmed that translocation of chloroplast-  
407 targeted NPR1 to the nucleus conveyed messages in the stressed chloroplasts and  
408 that NPR1 might be involved in retrograde chloroplast-to-nucleus signaling.

409

### 410 **Involvement of NPR1 in retrograde signaling communication**

411 Although identification of retrograde signaling proteins remains elusive, several  
412 plastid proteins, including NB-LRR receptor-interacting protein 1 (NRIP1) and the  
413 single-stranded DNA-binding protein WHIRLY 1, are suggested to be involved in  
414 retrograde chloroplast signaling (Chan et al., 2016). Molecules involved in retrograde  
415 signaling communication were divided into two groups: components for chloroplast  
416 biogenesis and development, and components for stress response and immunity in  
417 plants. Under high salinity, the transcription ratio of each retrograde signaling-related  
418 protein for chloroplast development was above 1 in *NPR1* overexpression lines  
419 (*NPR1-Ox*) versus WT, in which the expression ratio was highest at 12 h as  
420 quantified using real-time RT-PCR (Figure 5C, left and Supplemental Figure 6A).

421 Stress-related retrograde signaling components, including transcription factors  
422 reported in the literature, were investigated next (Figure 5C, right). Transcript levels  
423 of these genes showed stress-inducible patterns in the WT and *NPR1-Ox*, increasing  
424 transiently and peaking at 12 h of salt stress (Supplemental Figure 6B), supporting  
425 the conclusion that the retrograde signaling-related responses were transient and  
426 short-lived. The transcription ratio of each retrograde signaling-related protein for the  
427 stress response was above 1 and the ratio increases were greatest at 12 h in *NPR1-*  
428 *Ox* versus WT (Figure 5C, left) implying that the transcription ratio profile is  
429 consistent with the localization pattern of nuclear NPR1 under salt stress.

430 To further explore the physiological functions of NPR1 in response to salt stress,  
431 we compared Arabidopsis WT and *npr1-1* mutant plants. Compared with the WT, the  
432 *npr1-1* mutant under salt stress showed reduced  $F_v/F_m$  (Supplemental Figure 7A).  
433 The pattern for lower  $F_v/F_m$  ratio was consistent with the gene expression  
434 characteristics of several chloroplastic components for photosynthesis  
435 (Supplemental Figure 7B). Salt stress significantly decreased the expression level of  
436 photosynthesis-related genes encoded in chloroplasts, but the decrease was more  
437 severe in the *npr1-1* mutant, implying that NPR1 functions in the positive regulation



438 of gene expression in chloroplasts.

439 To investigate whether defective NPR1 affects expression of nuclear genes  
440 associated with retrograde communication, qRT-PCR analysis was performed.  
441 Under high salinity, expression levels of almost all analyzed genes remained similar  
442 to the basal level in the *npr1-1* mutant during the entire period of salt-stress  
443 treatment, which contrasted strongly with the gene expression pattern in WT plants  
444 (Supplemental Figure 8). The transcript level of all analyzed genes involved in  
445 stress-related retrograde signaling was significantly higher in the WT than in the  
446 *npr1-1* mutant. The expression ratio of each retrograde signaling-related gene was  
447 above 1 in WT versus *npr1-1* during the entire period of salt-stress treatment (Figure  
448 5D). Therefore, these results indicated that NPR1 might be a major regulator in  
449 retrograde signaling pathways.

450

451

## 452 **Discussion**

453 The chloroplast acts as a sensor of environmental and developmental cues that  
454 affect photosynthesis, relaying the information to the nucleus for coordination of plant  
455 growth and development and stress responses (Chan et al., 2016). This retrograde  
456 signaling regulates nuclear gene expression in response to developmental status  
457 and abiotic/biotic stresses (Fang et al., 2019). Recent advances have proposed a  
458 number of chloroplast retrograde signals, including carotenoid derivatives, isoprenoid  
459 precursors (methylerythritol cyclodiphosphate), 3'-phosphoadenosine 5'-phosphate,  
460 tetrapyrroles, heme, and ROS, together with transcription factors (Chan et al., 2016;  
461 Xiao et al., 2012; Pornsiriwong et al., 2017; Zhao et al., 2019a). These signals and  
462 related pathways build a communication network to regulate gene expression,  
463 miRNA biogenesis, RNA editing, and gene splicing to improve adaptation to  
464 developmental and stress stimuli (Fang et al., 2019; Petrillo et al., 2014; Godoy Herz  
465 et al., 2019; Zhao et al., 2019b; Zhao et al., 2020). Although several retrograde  
466 signaling modules have been identified, understanding the true complexity of the  
467 regulation of this pathway is in its infancy. Given that the regulation of retrograde  
468 signaling has been only partially explained, little is known about how signals are  
469 perceived and transmitted to the nucleus (Zhao et al., 2019b).



470 In this study, we showed that stress-induced chloroplast NPR1 was translocated  
471 to the nucleus in a redox-dependent manner via cytoplasmic vesicles or stromules  
472 (Figure 1, 2, and 4). In transformants of chloroplast-targeted NPR1-GFP fused with  
473 cTP, NPR1-GFP was detected in the nucleus under salt stress by immunoblotting  
474 and fluorescence image analysis, suggesting that NPR1 is moved from chloroplasts  
475 to the nucleus. Overexpression of chloroplast-targeted NPR1-GFP significantly  
476 enhanced stress tolerance and photosynthetic capability, and reduced accumulation  
477 of ROS under high salinity, compared with those of the WT (Figure 3). However,  
478 when NPR1 targeted to chloroplasts was overexpressed, ROS accumulation in the  
479 whole plant decreased but nuclear ROS accumulation increased (Figure 3D). This is  
480 considered to be because chloroplast-to-nucleus retrograde signaling was increased  
481 in accordance with ROS signaling.

482 The movement of chloroplast-targeted NPR1 to the nucleus was significantly  
483 enhanced by treatment with H<sub>2</sub>O<sub>2</sub> and ACC (Figure 2C). It was previously reported  
484 that stress-induced NPR1 localization in chloroplasts was significantly reduced in  
485 transgenic plants harboring a silenced ACC synthase gene (*NtACS4* and *NtACS1*)  
486 and in transgenic antisense plants expressing NADPH oxidase genes (*RbohD* and  
487 *RbohF*) (Seo et al., 2020). Taken together, it is suggested that NPR1 translocation  
488 into chloroplasts is triggered by production of stress-induced ROS and ethylene,  
489 after which chloroplast NPR1 moved to the nucleus to act as a transcription  
490 coactivator (Spoel et al., 2009). This retrograde signaling induced the resultant  
491 transcriptional changes to contribute to attenuation of photosynthetic capability loss,  
492 alleviation of cell damage, and enhanced stress tolerance.

493 Given that NPR1 is a redox-dependent protein, it has been proposed that it may  
494 be involved in retrograde signaling pathways (Gläßer et al., 2014; Kleine and Leister,  
495 2016). In particular, it has been suggested that the redox state of the photosynthetic  
496 electron transport chain triggers the movement of WHIRLY1 from the chloroplasts to  
497 the nucleus, and draws a parallel with the regulation of NPR1 from the cytosol to the  
498 nucleus (Foyer et al., 2014). In addition,  $\beta$ -cyclocitral or WHIRLY1, which are  
499 retrograde signaling components, have been suggested to increase SA synthesis  
500 and, as a result, NPR1 is connected to retrograde signaling through the translocation  
501 from the cytoplasm to the nucleus (Maruta et al., 2012; Lin et al., 2020). In the

502 present study, the expression of genes associated with well-known retrograde  
503 signaling components increased transiently in transgenic tobacco lines (*NPR1-Ox*)  
504 compared with that of the WT (Figure 5C), and the expression of these genes in the  
505 *Arabidopsis npr1-1* mutant remained almost at basal levels (Figure 5D). These  
506 results suggested that NPR1 was directly linked to retrograde signaling pathways  
507 rather than SA-mediated translocation of NPR1.

508 For example, WHIRLY1, which belongs to a small plant-specific family of  
509 DNA/RNA binding proteins, has been proposed to move from the chloroplast to the  
510 nucleus in response to environmental cues, such as high light intensity (Foyer et al.,  
511 2014; Świda-Barteczka et al., 2018). However, it did not seem to be translocated  
512 from chloroplasts to the nucleus, but rather it was more likely that the WHIRLY1  
513 protein comprised two isoforms localized in the chloroplasts and the nucleus,  
514 respectively (Lin et al., 2019). The dual functions of WHIRLY1 may be associated  
515 with its dual localization for coordination of the retrograde signaling from plastids to  
516 the nucleus (Ren et al., 2017). The plastid WHIRLY1 isoform predominantly affects  
517 stress-related gene expression, whereas nuclear WHIRLY1 primarily controls  
518 developmental gene expression. A shift from nuclear to plastid isoforms promotes  
519 H<sub>2</sub>O<sub>2</sub> accumulation and accelerates plant senescence and SA accumulation (Lin et  
520 al., 2019; 2020). However, the regulatory mechanism governing the functional switch  
521 of WHIRLY1 for mediation of plastid-to-nucleus retrograde signaling remains  
522 unknown.

523 Our previous findings suggested that NPR1 undergoes a functional switch from a  
524 molecular chaperone in chloroplasts for emergency restoration, which is associated  
525 with proteostasis and redox homeostasis, to a transcriptional coactivator in the  
526 nucleus for adaptation to stress (Seo et al., 2020). NPR1 and WHIRLY1 show  
527 similarities in that both proteins exhibit dual functions as well as dual localization in  
528 the chloroplasts and nucleus. However, there are major differences between these  
529 two proteins. NPR1 is first imported to the chloroplast and then moves to the nucleus,  
530 whereas WHIRLY1 is considered to exist as two isoforms (Lin et al., 2019).

531 There are several explanations for the expression of different protein isoforms  
532 with different functions, which are generated by alternative splicing or different  
533 modifications in their respective compartments under exposure to stress. The redox

534 state of the PQ pool in chloroplasts initiates an unknown chloroplast-to-nucleus  
535 retrograde signal to regulate the alternative splicing of nuclear genes through Pol II  
536 elongation (Godoy Herz et al., 2019). It is possible that alternative splicing of a  
537 certain gene can lead to the production of a protein with chloroplast/nucleus dual  
538 localization and this protein may act as a signaling protein of retrograde signaling.  
539 The chloroplast PQ pool redox state is indicated to connect chloroplast retrograde  
540 signaling with alternative splicing of nuclear genes (Petrillo et al., 2014; Jung and  
541 Mockler, 2014). We observed that increase in the DCMU-induced oxidized PQ pool  
542 and decrease in ROS production in response to DPI treatment were responsible for  
543 almost complete inhibition of nuclear NPR1 (Figure 1E). These results suggested  
544 that the redox states with PQ pool and ROS accumulation also affect the retrograde  
545 signaling of NPR1 from chloroplasts to the nucleus. Taken together, factors such as  
546 the chloroplast redox state that affect retrograde signaling influenced the  
547 accumulation of NPR1 in the chloroplasts and nucleus, which indicates that NPR1  
548 moves from the chloroplasts to the nucleus.

549 Norflurazone treatment significantly increased nuclear NPR1 (Figure 1E) and  
550 chloroplast NPR1 (Seo et al., 2020), which are indicative of the enhancement of  
551 retrograde signaling from chloroplasts to the nucleus. These results are consistent  
552 with the report that norflurazone affects plastid RNA editing, which triggers  
553 retrograde signaling through the GENOMES UNCOUPLED 1 (GUN1)-mediated  
554 pathway (Zhao et al., 2020). GUN1, an integrator of multiple retrograde signaling  
555 pathways, is associated with plastid protein homeostasis, chloroplast protein  
556 import/cytosolic folding stress, and plastid RNA editing under stress (Wu et al., 2019).  
557 Stress-enhanced chloroplast NPR1 also participates in protein homeostasis  
558 assuming the role of a chaperone under salt stress, which also can activate protein  
559 quality control in plastids (Seo et al., 2020). Lin treatment was completely inhibited  
560 by translocation of nuclear NPR1 from chloroplast-targeted NPR1 (Figure 2D),  
561 linking the chloroplast's function and retrograde signaling for tight control of proper  
562 allocation under stress. Therefore, one possible explanation for localization of NPR1  
563 protein is the additional connections between retrograde signaling and its  
564 translocation for functional switch. Retrograde signaling of NPR1 triggered by redox  
565 regulation or stress-induced components in organelles are important regulatory

566 mechanisms for plants to cope with environmental stresses. Plastid-to-nucleus  
567 retrograde signaling crucially contributes to normal growth and development in plants.  
568 For adjustment of cellular metabolism under adverse environmental conditions,  
569 particularly in photosynthetically active leaf cells, chloroplast NPR1 may be an  
570 emergency device, after which it functions as a retrograde communicator for the  
571 protective machinery from chloroplasts to the nucleus in a redox-mediated manner.

572

## 573 **Methods**

### 574 **Plant Materials and Growth Conditions**

575 *Nicotiana tabacum* cv. Wisconsin-38 was used for wild type (WT) and transgenic  
576 plants. *Arabidopsis thaliana* Col-0 and mutant *npr1-1* (Arabidopsis Biological  
577 Resource Center, Ohio State University, USA) were used in this study. The surface-  
578 sterilized seeds of tobacco and Arabidopsis were cultured on solid Murashige and  
579 Skoog (MS) medium (pH 5.8) under light (16L/8D, 100  $\mu\text{mol photons m}^{-2} \text{s}^{-1}$ ) at room  
580 temperature ( $25 \pm 5^\circ\text{C}$ ). After antibiotic selection, fully matured WT and transgenic  
581 plants were subjected to either salt stress (200 mM NaCl) or other chemicals.  
582 Solutions with salt and other chemicals were applied to the whole leaves with petiole  
583 or stems with several leaves in 20 mM MES buffer under light (100  $\mu\text{M photons m}^{-1} \text{s}^{-1}$ )  
584 at 25 °C. For the mock treatment, tobacco petioles or stems were treated with  
585 MES buffer without salt stress.

586

### 587 **Gene constructs and transgenic plants**

588 The preparation of the *p35S::NPR1-GFP* and the *p35S::NPR1-Ox* transgenic plants  
589 has been described previously (Seo et al., 2020). The open reading frame (ORF) of  
590 *NPR1* was PCR-amplified, and the resulting product was cloned into *pMBP* vector  
591 harboring 35S promoter-driven green fluorescence protein (GFP) gene and *NOS*  
592 *terminator*. The native *NPR1* promoter from the genomic DNA of *Nicotiana tabacum*  
593 was amplified by PCR. For the *pNPR1::NPR1-GFP* transgenic plants, the 0.8 kbp  
594 DNA fragment of the *NPR1* promoter was PCR-amplified and cloned into the  
595 *promoter-less NPR1-GFP* construct, which was prepared from *p35S::NPR1-GFP*

596 after deletion of the 35S promoter fragment. For the *p35S::cTP-NPR1-GFP*  
597 transgenic plants, the 237 bp PCR product of the transit peptide (79 amino acid  
598 residues) from the small subunit of RubisCo (GenBank AY220079) was cloned  
599 between the end of the 35S promoter and the 5' end of *NPR1* in the *p35S::NPR1-*  
600 *GFP* construct. For the *p35S::NPR1( $\Delta$ nls)-GFP* construct, 54 bp of nuclear  
601 localization sequence (NLS, nucleotide position from 1,612 to 1665) in the *NPR1*  
602 gene was deleted from *p35S::NPR1-GFP* using a GeneArt Site-directed  
603 Mutagenesis PLUS kit (Thermo Fisher Scientific, USA).

604 The resulting plasmid constructs were introduced into an *N. tabacum* by  
605 *Agrobacterium* (strain LBA 4404)-mediated transformation. Homozygous T3 plants  
606 were used for further study in all cases of *NPR1-Ox*, *pNPR1-NPR1-GFP*,  
607 *p35S::NPR1-GFP*, and *p35S::cTP-NPR1-GFP*. Even if they were T3 homozygous  
608 lines, they were used as experimental plants after confirming kanamycin resistance.  
609 The surface-sterilized transgenic seeds were cultured on solid Murashige and Skoog  
610 medium (pH 5.8) under light (16L/8D, 100  $\mu$ mol photons  $m^{-2} s^{-1}$ ) at room temperature  
611 ( $25 \pm 5^{\circ}C$ ).

612

### 613 **RNA Isolation and Real-Time qPCR**

614 Total RNA isolation was performed using Trizol Reagent (Molecular Research Center,  
615 USA). To analyze relative transcription levels by real-time qPCR, 1  $\mu$ g of the total  
616 RNA from the leaves was reverse-transcribed for 30 min at 42 $^{\circ}C$  in a 20- $\mu$ l reaction  
617 volume using a High Fidelity PrimeScript<sup>TM</sup> RT-PCR kit (Takara, Japan) according to  
618 the manufacturer's instructions. The gene-specific PCR primers for qPCR, whose  
619 sequence information was obtained from the GenBank database, were designed  
620 according to a stringent set of criteria (Supplemental Table 1), including a predicted  
621 melting temperature of 60 $^{\circ}C \pm 5^{\circ}C$ , primer lengths of 20 to 24 nucleotides, guanine-  
622 cytosine content of 50 to 60%, and PCR amplicon lengths of 100 to 250 bp. Real-  
623 time qPCR was performed in optical 96-well plates using a TP950 (Takara, Japan).  
624 Fluorescence threshold data (Ct) were analyzed using Thermal Cycler Dice Real-  
625 Time System Software (Takara, Japan) and then exported to Microsoft Excel for  
626 further analysis. The relative expression levels in each cDNA sample were

627 normalized to the reference gene  $\beta$ -actin. The transcription levels were expressed  
628 relative to the reference gene  $\beta$ -actin after qPCR. The mean levels of relative mRNA  
629 expression for each gene in WT, overexpressing transgenic plants (*NPR1-Ox*), and  
630 *npr1-1* mutants were obtained. The expression ratio for each gene was calculated in  
631 WT versus *NPR1-Ox* plants or WT versus *npr1-1* mutants. The profile of the  
632 transcription levels was measured in genes, which involved retrograde  
633 communication for chloroplast development and operational signaling to abiotic/biotic  
634 stress under salt stress.

635

### 636 **Trypan Blue Staining**

637 To monitor plant cell death, salt-treated tobacco leaf discs were immersed for 1 min  
638 in a boiling solution consisting of 10 ml of lactic acid, 10 ml of glycerol, 10 g of phenol,  
639 and 0.4% (w/v) trypan blue. After the plants had cooled to room temperature for 1 h,  
640 the solution was replaced with 70% (w/v) chloral hydrate. The stained plants were  
641 decolorized overnight and then photographed using a digital camera.

642

### 643 **Analysis of photosynthetic activity**

644 Eight-week-old whole plants were transferred to a growth chamber, and steady-state  
645 net photosynthesis was determined on a Gas Exchange Measuring Station (Walz,  
646 Germany) using a built-in light source ( $210 \mu\text{mol photons m}^{-2} \text{s}^{-1}$ ) (Wi and Park,  
647 2002). A gas stream ( $60 \text{ l h}^{-1}$ , 21%  $\text{O}_2$ , and  $430 \mu\text{l}^{-1} \text{CO}_2$ ) was provided continuously  
648 into the photosynthesis unit using a mass-flow control system. The leaf temperature  
649 was maintained at  $25^\circ\text{C}$ , and the humidity of the chamber was maintained at  $70 \pm$   
650 1%.

651

### 652 **Detection of GFP and CFP**

653 The expression of NPR1-GFP or NPR1-CFP in the intact leaves and roots of stable  
654 transgenic *NPR1-GFP* transgenic plants or protoplasts prepared from transgenic  
655 *NPR1-GFP* tobacco plants was detected. The protoplasts were prepared by



656 incubation in an enzyme solution (0.5 M mannitol, 1 mM CaCl<sub>2</sub>, 20 mM MES, 0.1%  
657 BSA, 1% cellulase R-10, and 0.25% marcerozyme R-10). The GFP fluorescence in  
658 the cells was detected using a confocal laser scanning microscope (FluoView 300,  
659 OLYMPUS, Japan and STELLARIS 8, Leica, Germany) or a fluorescence  
660 microscope (THUNDER Imager, Leica, Germany) equipped with a high-resolution  
661 CCD camera (OLYMPUS, FV300, Japan). GFP and CFP expression was visualized  
662 by excitation at 488 nm and emission at 520 nm and excitation at 450 nm and  
663 emission at 470 nm, respectively. Red chlorophyll fluorescence was visualized by  
664 excitation at 458 nm and emission at 647-720 nm. The fluorescence of DAPI (4',6-  
665 diamidino-2-phenylindole) staining for the nuclei was visualized by excitation at 358  
666 nm and emission at 461 nm. The fluorescence density was quantified using *ImageJ*  
667 *bundle software* (National Institutes of Health, USA).

668

#### 669 **ROS Detection in leaves**

670 For total ROS determination, leaf epidermal strips were peeled from tobacco leaves  
671 and floated on a solution of 50 µM 2'-7'dichlorofluorescein diacetate (DCFH-DA;  
672 Sigma Chemicals, St Louis, MO, USA). The leaf stripe samples were collected after  
673 salt stress treatment for the indicated time. The ROS was observed by fluorescence  
674 microscopy (excitation: 450 ± 490 nm; barrier 520 ± 560 nm) equipped with a cooled  
675 CCD camera (OLYMPUS, FV300, Japan). The superoxide anion level was  
676 determined using a nitroblue tetrazolium (NBT) solution (0.2%) in 50 mM sodium  
677 phosphate buffer (pH 7.5), and the H<sub>2</sub>O<sub>2</sub> level was determined using  
678 diaminobenzidine (DAB) staining solution (1 mg/ml) in distilled water.

679

#### 680 **Chloroplast and nucleus isolation, protein extraction, and Western blotting**

681 To extract the total protein from tobacco roots, frozen tissues were ground to a  
682 powder and suspended in protein extraction buffer (50 mM Tris-HCl, pH 7.5, 150 mM  
683 NaCl, 5 mM EDTA, 0.1% Triton X-100, 0.2% Nonidet P-40 (NP-40), 50 µg/ml of  
684 tosyl-L-phenylalaninyl-chloromethylketone, 50 µg/ml of tosyl-L-lysine-  
685 chloromethylketone, serine protease inhibitors, 0.6 mM phenylmethylsulfonyl fluoride



686 (PMSF), 80  $\mu$ M MG115, 80  $\mu$ M MG132, and one complete protease inhibitor cocktail  
687 tablet (Roche, USA)).

688 To extract the chloroplast stroma protein from the tobacco leaves, the  
689 chloroplasts were first isolated from the intact leaves using a chloroplast isolation kit  
690 (Sigma-Aldrich, USA), after which further intact chloroplasts were harvested using a  
691 40/80% Percoll gradient. Intact chloroplasts were suspended in chloroplast lysis  
692 buffer (0.5 mM HEPES-KOH, pH 7.5, 2 mM  $MgCl_2$ , 1 mM NaF, 1mM EDTA, 1 mM  
693 PMSF, 80  $\mu$ M MG115, 80  $\mu$ M MG132, and one complete protease inhibitor cocktail  
694 tablet (Roche, USA)). After lysate centrifugation, the supernatants were recovered as  
695 the total proteins or chloroplast stroma proteins. The inhibition of proteasome-  
696 dependent degradation was accomplished by 40  $\mu$ M MG115.

697 To extract the nuclear proteins from the tobacco leaves, the nuclei were first  
698 isolated from the intact leaves, after which the nuclear proteins were extracted using  
699 a plant nuclei isolation/extraction kit, CelLytic<sup>TM</sup> PN (Sigma-Aldrich, USA). The nuclei  
700 were collected from leaves using a nuclei isolation buffer by mesh filtering according  
701 to the manufacturer's protocol. The cell lysate was prepared with 2.3 M sucrose by  
702 centrifugation at 12,000 x g for 10 min, after which the supernatant was removed.  
703 The nuclei pellet was then added to the nuclear protein extraction buffer. Nuclei  
704 proteins were then added to a working extraction buffer in addition to 80  $\mu$ M MG115  
705 and 80  $\mu$ M MG132 and then centrifuged for 10 min at 12,000 x g. The pure  
706 supernatant was used to obtain soluble nuclear proteins.

707 Proteins (100  $\mu$ g of the total proteins, 20  $\mu$ g of chloroplast stroma proteins, or  
708 20  $\mu$ g or 50  $\mu$ g of nuclear proteins) were separated by 4-12% Bis-Tris Plus (Novex,  
709 USA). The proteins were transferred onto iBlot 2 NC Regular Stacks (Novex, Israel),  
710 after which the blots were blocked using iBind Cards (Novex, Israel) according to the  
711 manufacturer's instructions. NPR1-GFP proteins were detected by reacting the blots  
712 with the mouse monoclonal anti-GFP monoclonal antibody (Clontech, USA) and  
713 horseradish peroxidase-conjugated secondary antibody (Santa Cruz, USA). The  
714 bands were visualized using SuperSignal West Substrate Working Solution  
715 (Thermo Scientific, USA) on X-ray film. The primary antibodies for anti-RbcL  
716 (Agrisera) and anti-histon3 (Agrisera) were used to confirm the equal loading of

717 proteins.

718

### 719 **Immunoprecipitation using the anti-GFP antibody**

720 For immunoprecipitation of the GFP-fused NPR1 proteins, the cytosol and nuclear  
721 proteins were extracted separately from the *p35S::cTP-NPR1-GFP* transgenic  
722 tobacco leaves using an immunoprecipitation buffer (1X phosphate-buffered saline,  
723 pH 7.4 (Cat. no. 10010-031, ThermoFisher Scientific, USA) containing MG115,  
724 MG132, and plant protease inhibitor cocktail (Sigma, USA). The protein lysates (30  
725 µg) were precleared with 50 µl of sheep anti-rabbit magnetic beads in a  
726 microcentrifuge tube at room temperature for 1 h with gentle rotation. To the  
727 precleared lysate, 5% NGS (Normal Goat Serum, pH 7.4) in PBS was added for  
728 blocking. Subsequently, the primary anti-GFP antibody diluted in PBS was added to  
729 a final concentration of 0.2 µg/ml. After incubating the mixture at 4°C overnight with  
730 gentle rotation, the supernatant was discarded. The bead mixture was washed in  
731 wash buffer (5% NGS in PBS, 1% Triton® X-100, 3% BSA) by pipetting gently up  
732 and down. The bound proteins were eluted by boiling in 25 µl of 1X SDS sample  
733 buffer. The supernatant was analyzed by SDS-PAGE and immunoblotting with the  
734 anti-Ubiquitin antibody (Santa Cruz, USA).

735

### 736 **Transient expression in tobacco protoplasts**

737 Mesophyll protoplasts from the WT or transgenic tobacco leaves were isolated using  
738 a protoplast extract enzyme solution (pH 5.7) consisting of 1% cellulose R-10 and  
739 0.25% marcerozyme R-10. The leaf slices were transferred to a Petri dish containing  
740 enzyme solution and incubated in the dark for 12 h at 25°C. After incubation, the  
741 enzyme solution was discarded by mesh (10 mm) filtration, and the cells were  
742 overlaid with 1 ml of a W5 buffer (154 mM NaCl; 5 mM KCl; 125 mM CaCl<sub>2</sub>; 5 mM  
743 glucose; 1.5 M MES, pH 5.7). After gentle centrifugation (5 min at 80 g), the  
744 protoplasts floating at the interface were collected, washed with W5 (3/1 v/v),  
745 pelleted by centrifugation (10 min at 80 g), and resuspended in W5 solution. After  
746 stabilizing the protoplasts in ice for 30 min, protoplasts at a density of 10<sup>6</sup>/ml were

747 used for a further transient transformation.

748 Protoplasts (300  $\mu$ l) in W5 buffer were pipetted gently into a disposable 0.4 cm  
749 pre-chilled electroporation cuvette, and 50  $\mu$ g of the DNA constructs in 10  $\mu$ l of TE  
750 buffer was added. Electroporation was performed using the Gene Pulser Xcell  
751 System (Bio Rad, USA). Electroporation was carried out with 160 V/ 960  $\mu$ F  
752 (voltage/capacitance) according to the manufacturer's instructions. After  
753 electroporation, the cuvette was chilled on ice for 10 min, after which protoplasts  
754 were transferred to a conical tube using a glass Pasteur pipette with the addition of  
755 500  $\mu$ l of K3 media (154 mM NaCl; 125 mM CaCl<sub>2</sub>; 5 mM sucrose; 5 mM xylose; 1.5  
756 mM MES, pH 5.7). These protoplasts were investigated using a confocal microscope.

757

## 758 **Statistical analyses**

759 All experiments were repeated at least three times with three replicates, and the data  
760 from one representative experiment are presented. The statistically significant  
761 differences according to a t-test between the transgenic lines and respective controls  
762 at each time point are indicated with a single asterisk (\*) ( $P < 0.05$ ) or two asterisks  
763 (\*\*) ( $P < 0.01$ ).

764

765

## 766 **Acknowledgments**

767 We thank Dr Choong-Min Ryu for providing seeds of the *npr1-1* mutant, and for  
768 critical advice and discussion of the experiments. We also thank Dr June M. Kwak  
769 for very helpful advice on this study. We thank Robert McKenzie, PhD, from Edanz  
770 Group (<https://en-author-services.edanz.com/ac>), for editing a draft of this  
771 manuscript. Funding: This work was supported by grants from the National Research  
772 Foundation of Korea (NRF2017R1D1A3B03034134 and NRF2020R1AC1012652)  
773 and the Korean Research Institute of Biology and Biotechnology (2019-0240 and  
774 2020-0266) to K.Y.P. Competing interests: The authors declare no competing  
775 interests. Data and materials availability: All data are available in the manuscript or

776 the Supplemental materials. The sequence of tobacco NPR1 was deposited in the  
777 GenBank database under accession number KY402167.

778

779

#### 780 **Author contributions**

781 S.Y.S. conducted all experiments. K.Y.P. designed and supervised the work,  
782 analyzed the data, and prepared the manuscript. Both authors discussed the results  
783 and approved the manuscript.

784

785

786

787

#### 788 **References**

789 **Armbruster, U., Hertle, A., Makarenko, E., Zühlke, J., Pribil, M., Dietzmann, A.,**  
790 **Schliebner, I., Aseeva, E., Fenino, E., and Scharfenberg, M., et al.** (2009).  
791 Chloroplast proteins without cleavable transit peptides: rare exceptions or a  
792 major constituent of the chloroplast proteome? *Mol. Plant* **2**:1325–1335.

793 **Brigelius-Flohé, R., and Flohé, L.** (2011). Basic principles and emerging concepts  
794 in the redox control of transcription factors. *Antioxid. Redox Signaling*  
795 **15**:2335–2381.

796 **Brunkard, J.O., Runkel, A.M., and Zambryski, P.C.** (2015). Chloroplasts extend  
797 stromules independently and in response to internal redox signals. *Proc. Natl.*  
798 *Acad. Sci. USA* **112**: 10044–10049.

799 **Caplan, J.L.** (2015). Chloroplast stromules function during innate immunity. *Dev. Cell*  
800 **34**:45–57.

801 **Chan, K.X., Phua, S.Y., Crisp, P., McQuinn, R., and Pogson, B.J.** (2016). Learning  
802 the Languages of the Chloroplast: Retrograde Signaling and Beyond. *Annu. Rev.*  
803 *Plant Biol.* **67**:25–53.

804 **Després, C., Chubak, C., Rochon, A., Clark, R., Bethune, T., Desveaux, D., and**  
805 **Fobert, P. R.** (2003). The Arabidopsis NPR1 disease resistance protein is a  
806 novel cofactor that confers redox regulation of DNA binding activity to the basic

- 807 domain/leucine zipper transcription factor TGA1. *Plant Cell* **15**:2181–2191.
- 808 **Exposito-Rodriguez, M., Laissue, P.P., Yvon-Durocher, G., and Smirnov, N.**  
809 (2017). Photosynthesis-dependent H<sub>2</sub>O<sub>2</sub> transfer from chloroplasts to nuclei  
810 provides a high-light signalling mechanism. *Nat. Commun.* **8**:49.
- 811 **Fang, X, Zhao, G., Zhang, S., Li, Y., Gu, H., Li, Y., Zhao, Q., and Qi, Y.** (2019).  
812 Chloroplast-to-Nucleus Signaling Regulates MicroRNA Biogenesis in Arabidopsis.  
813 *Dev. Cell* **48**:371-382.e4.
- 814 **Foyer, C. H., Karpinska, B., and Krupinska, K.** (2014). The functions of WHIRLY1  
815 and REDOX-RESPONSIVE TRANSCRIPTION FACTOR1 in cross tolerance  
816 responses in plants: a hypothesis. *Phil. Trans. R. Soc. B.* **369**:20130226.
- 817 **Gläßer, C., Haberer, G., Finkemeier, I., Pfannschmidt, T., Kleine, T., Leister, D.,**  
818 **Dietz, K.J., Häusler, R.E., Grimm, B., and Mayer, K.F.** (2014). Meta-analysis of  
819 retrograde signaling in Arabidopsis thaliana reveals a core module of genes  
820 embedded in complex cellular signaling networks. *Mol. Plant* **7**:1167-1190.
- 821 **Godoy Herz, M.A., Kubaczka, M.G., Brzyżek, G., Servi, L., Krzyszton, M.,**  
822 **Simpson, C., Brown, J., Swiezewski, S., Petrillo, E., and Kornblihtt, A.R.**  
823 (2019). Light Regulates Plant Alternative Splicing through the Control of  
824 Transcriptional Elongation. *Mol. Cell* **73**:1066-1074.
- 825 **Hanson, M.R., and Hines, K.M.** (2018). Stromules: probing formation and function.  
826 *Plant Physiol.* **176**:128–137.
- 827 **Jung, H.S., and Mockler, T.C.** (2014). A new alternative in plant retrograde signaling.  
828 *Genome Biol.* **15**:117.
- 829 **Kim, J., and Mullet, J.E.** (2003). A Mechanism for light-Induced translation of  
830 the *rbcL* mRNA encoding the large subunit of ribulose-1,5-bisphosphate  
831 carboxylase in barley chloroplasts. *Plant Cell Physiol.* **44**:491–499.
- 832 **Kleine, T., and Leister, D.** (2016). Retrograde signaling: Organelles go networking.  
833 *Biochim. Biophys. Acta.* **1857**:1313-1325.
- 834 **Lin, W., Huang, D., Shi, X., Deng, B., Ren, Y., Lin, W., and Miao, Y.** (2019). H<sub>2</sub>O<sub>2</sub>  
835 as a feedback signal on dual-located WHIRLY1 associates with leaf senescence

- 836 in Arabidopsis. *Cells* **8**:1585.
- 837 **Lin, W., Zhang, H., Huang, D., Schenke, D., Cai, D., Wu, B., and Miao, Y. (2020).**  
838 Dual-Localized WHIRLY1 Affects Salicylic Acid Biosynthesis via Coordination of  
839 ISOCHORISMATE SYNTHASE1, PHENYLALANINE AMMONIA LYASE1, and S-  
840 ADENOSYL-L-METHIONINE-DEPENDENT METHYLTRANSFERASE1. *Plant*  
841 *Physiol.* **184**:1884-1899.
- 842 **Maruta, T., Noshi, M., Tanouchi, A., Tamoi, M., Yabuta, Y., Yoshimura, K.,**  
843 **Ishikawa, T., and Shigeoka, S. (2012).** H<sub>2</sub>O<sub>2</sub>-triggered retrograde signaling from  
844 chloroplasts to nucleus plays specific role in response to stress. *J. Biol. Chem.*  
845 **287**:11717–11729.
- 846 **Mata-Pérez, C., and Spoel, S.H. (2019).** Thioredoxin-mediated redox signalling in  
847 plant immunity. *Plant Sci.* **279**:27–33.
- 848 **Mou, Z., Fan, W., and Dong, X. (2003).** Inducers of plant systemic acquired  
849 resistance regulate NPR1 function through redox changes. *Cell* **113**:935–944.
- 850 **Mühlenbock, P., Szechynska-Hebda, M., Plaszczyca, M., Baudo, M., Mateo, A.,**  
851 **Mullineaux, P. M., Parker, J. E., Karpinska, B., and Karpinski, S. (2008).**  
852 Chloroplast signaling and LESION SIMULATING DISEASE1 regulate crosstalk  
853 between light acclimation and immunity in Arabidopsis. *Plant Cell* **20**: 2339–2356.
- 854 **Müllineaux, P.M., Exposito-Rodriguez, M., Laissue, P.P., Smirnov, N., and Park,**  
855 **E. (2020).** Spatial chloroplast-to-nucleus signaling involving plastid–nuclear  
856 complexes and stromules. *Phil. Trans. R. Soc. B* **375**:20190405.
- 857 **Munné-Bosch, S., Queval, G., and Foyer, C.H. (2013).** The impact of global  
858 change factors on redox signaling underpinning stress tolerance. *Plant Physiol.*  
859 **161**:5–19.
- 860 **Nanjo, Y., Oka, H., Ikarashi, N., Kaneko, K., Kitajima, A., Mitsui, T., Muñoz, F.J.,**  
861 **Rodríguez-López, M., Baroja-Fernández, E., and Pozueta-Romero, J. (2006).**  
862 Rice plastidial N-glycosylated nucleotide pyrophosphatase/phosphodiesterase is  
863 transported from the ER-golgi to the chloroplast through the secretory pathway.  
864 *Plant Cell* **18**:2582–2592.
- 865 **Park, J.H., Tran, L.H., and Jung, S. (2017).** Perturbations in the photosynthetic



- 866 pigment status result in photooxidation-Induced crosstalk between carotenoid  
867 and porphyrin biosynthetic pathways. *Front Plant Sci.* **8**:1992.
- 868 **Petrillo, E., Godoy Herz, M.A., Fuchs, A., Reifer, D., Fuller, J., Yanovsky, M.J.,**  
869 **Simpson, C., Brown, J.W., Barta, A., Kalyna, M., et al.** (2014). A chloroplast  
870 retrograde signal regulates nuclear alternative splicing. *Science* **344**:427-430.
- 871 **Pfalz, J., Liebers, M., Hirth, M., Grübler, B., Holtzegel, U., Schröter, Y., Dietzel, L.,**  
872 **and Pfannschmidt, T.** (2012). Environmental control of plant nuclear gene  
873 expression by chloroplast redox signals. *Front Plant Sci.* **3**:257.
- 874 **Pfannschmidt, T., Terry, M.J., van Aken, O., and Quiros, P.M.** (2020). Retrograde  
875 signals from endosymbiotic organelles: a common control principle in eukaryotic  
876 cells. *Phil. Trans. R. Soc. B.* **375**: 20190396.
- 877 **Pornsiriwong, W., Estavillo, G.M., Chan, K.X., Tee, E.E., Ganguly, D., Crisp, P.A.,**  
878 **Phua, S.Y., Zhao, C., Qiu, J., Park, J., et al.** (2017). A chloroplast retrograde  
879 signal, 3'-phosphoadenosine 5'-phosphate, acts as a secondary messenger in  
880 abscisic acid signaling in stomatal closure and germination. *Elife* **6**:e23361.
- 881 **Ren, Y., Li, Y., Jiang, Y., Wu, B., and Miao, Y.** (2017). Phosphorylation of WHIRLY1  
882 by CIPK14 shifts its localization and dual functions in Arabidopsis. *Mol. Plant*  
883 **10**:749-763.
- 884 **Ritzenthaler, C., Nebenführ, A., Movafeghi, A., Stussi-Garaud, C., Behnia, L.,**  
885 **Pimpl, P., Staehelin, L.A., and Robinson, D.G.** (2002). Reevaluation of the  
886 effects of brefeldin A on plant cells using tobacco Bright Yellow 2 cells expressing  
887 Golgi-targeted green fluorescent protein and COPI antisera. *Plant Cell*  
888 **14**:237-261.
- 889 **Selga, T., Selga, M., Gobiňš, V., and Ozoliņa, A.** (2010). Plastid-nuclear complexes:  
890 permanent structures in photosynthesizing tissues of vascular plants. *A. Env.*  
891 *Exp. Biol.* **8**:85-92.
- 892 **Seo, S.Y., Wi, S.J., and Park, K.Y.** (2020). Functional switching of NPR1 between  
893 chloroplast and nucleus for adaptive response to salt stress. *Sci. Rep.* **10**:4339.
- 894 **Smirnoff, N., and Arnaud, D.** (2019). Hydrogen peroxide metabolism and functions  
895 in plants. *New Phytol.* **221**:1197-1214.



- 896 **Spoel, S.H., Mou, Z., Tada, Y., Spivey, N.W., Genschik, P., and Dong, X.** (2009).  
897 Proteasome-mediated turnover of the transcription coactivator NPR1 plays dual  
898 roles in regulating plant immunity. *Cell* **137**:860–872.
- 899 **Świda-Barteczka, A., Krieger-Liszka, A., Bilger, W., Voigt, U., Hensel, G.,**  
900 **Szweykowska-Kulinska, Z., and Krupinska, K.** (2018). The plastid-nucleus  
901 located DNA/RNA binding protein WHIRLY1 regulates microRNA-levels during  
902 stress in barley (*Hordeum vulgare* L.). *RNA Biol.* **15**:886-891.
- 903 **Tada, Y., Spoel, S. H., Pajerowska-Mukhtar, K., Mou, Z., Song, J., Wang, C., Zuo,**  
904 **J., and Dong, X.** (2008). Plant immunity requires conformational changes of  
905 NPR1 via S-nitrosylation and thioredoxins. *Science* **321**:952–956.
- 906 **van der Reest, J., Lilla, S., Zheng, L., Zanivan, S., and Gottlieb, S.E.** (2018).  
907 Proteome-wide analysis of cysteine oxidation reveals metabolic sensitivity to  
908 redox stress. *Nat Commun.* **9**:1581.
- 909 **van Eerden, F.J., Melo, M.N., Frederix, P.W.J.M., Periole, X., and Marrink, S.J.**  
910 (2017). Exchange pathways of plastoquinone and plastoquinol in the  
911 photosystem II complex. *Nat. Commun.* **8**:15214.
- 912 **Wi, S.J., and Park, K.Y.** (2002). Antisense expression of carnation cDNA encoding  
913 ACC synthase or ACC oxidase enhances polyamine content and abiotic stress  
914 tolerance in transgenic tobacco plants. *Mol. Cells* **13**:209–220.
- 915 **Wu, G.Z., Meyer, E.H., Richter, A.S., Schuster, M., Ling, Q., Schöttler, M.A.,**  
916 **Walther, D., Zoschke, R., Grimm, B., Jarvis, R.P., et al.** (2019). Control of  
917 retrograde signalling by protein import and cytosolic folding stress. *Nat. Plants*  
918 **5**:525–538.
- 919 **Xiao, Y., Savchenko, T., Baidoo, E.E., Chehab, W.E., Hayden, D.M., Tolstikov, V.,**  
920 **Corwin, J.A., Kliebenstein, D.J., Keasling, J.D., and Dehesh, K.** (2012).  
921 Retrograde signaling by the plastidial metabolite MEcPP regulates expression of  
922 nuclear stress-response genes. *Cell* **149**:1525-1535.
- 923 **Yan, X., Khan, S., Hase, T., Emes, M.J., and Bowsher, C.G.** (2006). Differential  
924 uptake of photosynthetic and non-photosynthetic proteins by pea root  
925 plastids. *FEBS Lett.* **580**: 6509–6512.

926 **Zavaliev, R., Mohan, R., Chen, T., and Dong, X.** (2020). Formation of NPR1  
927 condensates promotes cell survival during the plant immune response. *Cell*  
928 **182**:1093–1108.

929 **Zhao, C., Wang, Y., Chan, K.X., Marchant, D.B., Franks, P.J., Randall, D., Tee,**  
930 **E.E., Chen, G., Ramesh, S., Phua, S.Y., et al.** (2019a). Evolution of chloroplast  
931 retrograde signaling facilitates green plant adaptation to land. *Proc. Natl. Acad.*  
932 *Sci. USA.* **116**:5015-5020.

933 **Zhao, X., Huang, J., and Chory, J.** (2019b). GUN1 interacts with MORF2 to  
934 regulate plastid RNA editing during retrograde signaling. *Proc. Natl. Acad. Sci.*  
935 *USA.* **116**:10162-10167.

936 **Zhao, X., Huang, J., and Chory, J.** (2020). Unraveling the Linkage between  
937 Retrograde Signaling and RNA Metabolism in Plants. *Trends Plant Sci.* **25**:141-  
938 147.

939  
940  
941

## 942 **Figure legends**

943 **Figure 1. Intracellular localization of GFP-tagged NPR1 in leaf cells under salt**  
944 **stress.**

945 **(A)** Confocal laser scanning microscopy (CLSM) images of GFP fluorescence in  
946 mesophyll protoplasts from 6-week-old *pNPR1::NPR1-GFP* transgenic plants after  
947 salt stress with 200 mM NaCl. Images of GFP fluorescence (green) and chlorophyll  
948 autofluorescence from chloroplasts (red) are merged in the third column. DAPI  
949 staining (blue) was in the fourth column of the last row.

950 **(B)** Cytoplasmic vesicles containing NPR1-GFP observed in the cytoplasmic region.  
951 NPR1-GFP is contained in green vesicles of various sizes. Cytoplasmic vesicles  
952 within the area enclosed by the dotted line are highlighted.

953 **(C)** Localization of NPR1-GFP in the nucleus at 24 h after salt stress treatment.  
954 Highlights of the nuclear NPR1-GFP, which is merged with autofluorescence and  
955 DAPI images (upper right). In the enlarged image, the nucleus area within the dotted  
956 line is highlighted.

957 **(D)** Snapshots of rapidly moving cytoplasmic vesicles containing NPR1-GFP in  
958 guard cells from the abaxial epidermis of *pNPR1::NPR1-GFP* transgenic plants at 6  
959 h after salt stress treatment. White arrows indicate vesicles. N: nucleus.

960 **(E)** Fluorescence intensity of NPR1-GFP in the nucleus from *p35S::NPR1-GFP*  
961 transgenic plants under salt stress. Inhibitors were co-treated with salt stress.  
962 Inhibitors: 3-(3,4-dichlorophenyl)-1,1-dimethylurea (DCMU), 2,5-dibromo-3-methyl-6-  
963 isopropylbenzoquinone (DBMIB), diphenyleneiodonium (DPI), lincomycin (Lin),  
964 norflurazone (Nf). An asterisk indicates a significant difference between  
965 transformants treated with salt only and transformants co-treated with salt and other  
966 chemicals (\*\* $P < 0.01$ ).

967

968 **Figure 2. Nuclear import of NPR1-GFP under salt stress.**

969 **(A)** CLSM images of NPR1-GFP fluorescence in salt-stressed protoplasts of  
970 *p35S::cTP-NPR1-GFP* transgenic plants. Enlarged CSLM images in the last column.  
971 White box indicates the whole nucleus. White circle and asterisk indicate cytoplasmic  
972 vesicles and chloroplast protrusions, respectively.

973 **(B)** CLSM images of NPR1-GFP in salt-stressed guard cells of *p35S::cTP-NPR1-*  
974 *GFP* transgenic plants. Arrows indicates the whole nucleus.

975 **(C and D)** Fluorescence intensity of GFP in the nucleus of mesophyll protoplasts  
976 from *p35S::cTP-NPR1-GFP* transgenic plants. GFP fluorescence was photographed  
977 in mesophyll protoplasts of transgenic plants after application of H<sub>2</sub>O<sub>2</sub> or ACC, and  
978 then GFP intensity was quantified in the nucleus **(C)**. After co-treatment of an  
979 inhibitor of Lincomycin (Lin) with H<sub>2</sub>O<sub>2</sub> or ACC, the GFP intensity was quantified in  
980 the nucleus of protoplasts isolated from transgenic plants **(D)**. An asterisk indicates a  
981 significant difference from 0 h (\* $P < 0.05$ , \*\* $P < 0.01$ ).

982 **(E)** Localization of NPR1-GFP in pavement cells of the abaxial epidermis of leaves in  
983 *pNPR1::NPR1-GFP* after salt stress (upper) and SA treatment (middle) and  
984 *p35S::cTP-NPR1-GFP* after salt stress (lower). Arrows indicate NPR1 condensates.

985 **(F)** Localization of NPR1-GFP in intracellular compartments of roots in in  
986 *pNPR1::NPR1-GFP* (upper) and *p35S::cTP-NPR1-GFP* (lower) transgenic plants  
987 under salt stress. EZ: elongation zone, MZ: meristematic zone.

988

989 **Figure 3. Enhancement of chloroplast-targeted NPR1 in stress resistance.**

990 **(A)** The maximal photochemical efficiency of photosystem II ( $F_v/F_m$ ) was measured in  
991 WT, *p35S::NPR1-GFP*, and *p35S::cTP-NPR1-GFP* tobacco plants after salt stress.

992 **(B)** Necrotic areas in salt-stressed plants were stained with trypan blue.

993 **(C)** Histochemical analysis of ROS accumulation. Superoxide anion was detected by  
994 NBT staining (left), and  $H_2O_2$  was detected by DAB staining (right).

995 **(D)** Accumulation of ROS in cellular compartments of guard cells in WT and  
996 transgenic plants under salt stress. ROS was determined using CLSM after staining  
997 with 50  $\mu$ M DCFH-DA.

998 **(E)** Kinetics of nuclear-encoded gene transcription in WT and two transgenic plants  
999 upon salt stress. Nucleus-encoded genes: *Rbc S*, RubisCO Small subunit; *CAB3*,  
1000 Chlorophyll *a/b*-binding protein 3; *CAB12*, Chlorophyll *a/b*-binding protein 12, *CAB21*,  
1001 Chlorophyll *a/b*-binding protein 21; *CAB36*, Chlorophyll *a/b*-binding protein 36; *PsaF*,  
1002 Photosystem I reaction center subunit III; *PsaK*, Photosystem I subunit X; *PsaN*,  
1003 Photosystem I reaction center subunit XII. The relative mRNA expression levels are  
1004 expressed as the mean  $\pm$  SD. An asterisk indicates a significant difference between  
1005 WT and transgenic plants at an indicated time (\* $P < 0.05$ , \*\* $P < 0.01$ ).

1006

1007 **Figure 4. Signaling machinery from the chloroplasts to the nucleus under salt stress.**

1008 **(A and B)** CLSM images observed after co-transient expression of *p35S*-driven  
1009 *GFP*-tagged *NPR1* in which the nuclear localization sequence (NLS) was deleted  
1010 and *p35S*-driven *NPR1*-CFP in mesophyll protoplasts of WT at 24 h after salt stress  
1011 treatment. The white circle in the merge column indicates the nucleus site, and the  
1012 blue *NPR1*-CFP is weakly visible in the nucleus **(A)**. The dotted gray box in the  
1013 merge column shows an image of the vesicle-shaped *NPR1*-CFP protruding from the  
1014 chloroplast, which is enlarged **(B)**.

1015 **(C)** Fluorescence intensity of *NPR1*-CFP (blue bar) and *NPR1*( $\Delta$ NLS)-*GFP* (green  
1016 bar) in the chloroplasts after co-transient expression of both constructs. An asterisk  
1017 indicates a significant difference between stress-treated or untreated cases (\*\* $P <$   
1018 0.01).

1019 **(D)** CLSM images of stromules (upper row), cytoplasmic vesicles (middle row), and  
1020 chloroplast protrusions (lower row) from isolated chloroplasts from *p35S::cTP-NPR1*-

1021 *GFP* transgenic plants under salt stress. White arrows indicate stromules and white  
1022 triangles indicate chloroplast protrusions.

1023 **(E)** CLSM images of NPR1-GFP fluorescence in salt-stressed protoplasts treated  
1024 with brefeldin A (BFA, bottom). Fifth and sixth column: enlarged CSLM images. White  
1025 circles indicate the whole nucleus. White arrows indicate cytoplasmic vesicles.

1026

1027 **Figure 5.** Western blot analysis of NPR1 for subcellular localization and expression  
1028 analysis of retrograde signaling-related genes.

1029 **(A and B)** Immunoblots showing NPR1-GFP in the protein fractions of chloroplast  
1030 stroma **(A)** from *pNPR1::NPR1-GFP* (left) and *p35S::cTP-NPR1-GFP* (right)  
1031 transgenic plants, and nucleus from *pNPR1::NPR1-GFP* **(B)** transgenic plants under  
1032 salt stress by non-denatured SDS-PAGE. Oligomers (square bracket), dimeric form  
1033 (blue arrow), and monomeric form (red arrow).

1034 **(C)** Expression ratios of retrograde signaling-related genes for chloroplast  
1035 development (left) and for biotic/abiotic stress (right) in *NPR1-Ox* versus wild type  
1036 (WT) after salt stress.

1037 **(D)** Expression ratios of retrograde signaling-related genes for biotic/abiotic stress in  
1038 WT versus *npr1-1* mutant after salt stress treatment. The expression ratio was  
1039 computed based on the relative expression level of each gene in *NPR1-Ox* versus  
1040 WT **(C)** or WT versus *npr1-1* mutant **(D)** after salt stress treatment. Chloroplast  
1041 development: *GUN1*, Genomes uncoupled 1; *Sig6*, Chloroplast sigma factor 6; *STN7*,  
1042 Serine/threonine-protein kinase 7; *Sig2*, Chloroplast sigma factor 2; *POR1*,  
1043 NADPH:protochlorophyllide oxidoreductase; *PC1*, Plastocyanin; *Chl1*, Magnesium-  
1044 protoporphyrin chelatase subunit. Biotic/abiotic stress: *ABI4*, Abscisic acid-  
1045 insensitive protein 4; *SAL1*, 3'-phosphoadenosine 5'-phosphate phosphatase; *NRIP1*,  
1046 N receptor-interacting protein; *EX2*, Executer 2; *GLK1*, Golden 2-like 1; *ZAT10*, Zinc  
1047 finger transcription factor 10; *EX1*, Executer 1; *WHY1*, single-stranded DNA-binding  
1048 protein WHIRLY 1; *PRIN2*, Plastid redox insensitive 2; *EGY1*, ethylene-dependent  
1049 gravitropism-deficient and yellow-green 1; *RRTF*, redox responsive transcription  
1050 factor; *FC2*, ferrochelataase; *GLK2*, Golden 2-like 2; *NPR1*, Nonexpressor of  
1051 pathogenesis-related genes 1. An asterisk indicates a significant difference between  
1052 WT and *NPR1-Ox* tobacco or *npr1-1* Arabidopsis plants at an indicated time (\**P* <

1053 0.05, \*\* $P < 0.01$ ).

1054

1055

1056

1057

1058 **Supplemental Information**

1059 Supplemental Table 1

1060 Supplemental Figure 1-8

1061 Supplemental Movie 1-3

1062

1063

1064



**Figure 1**

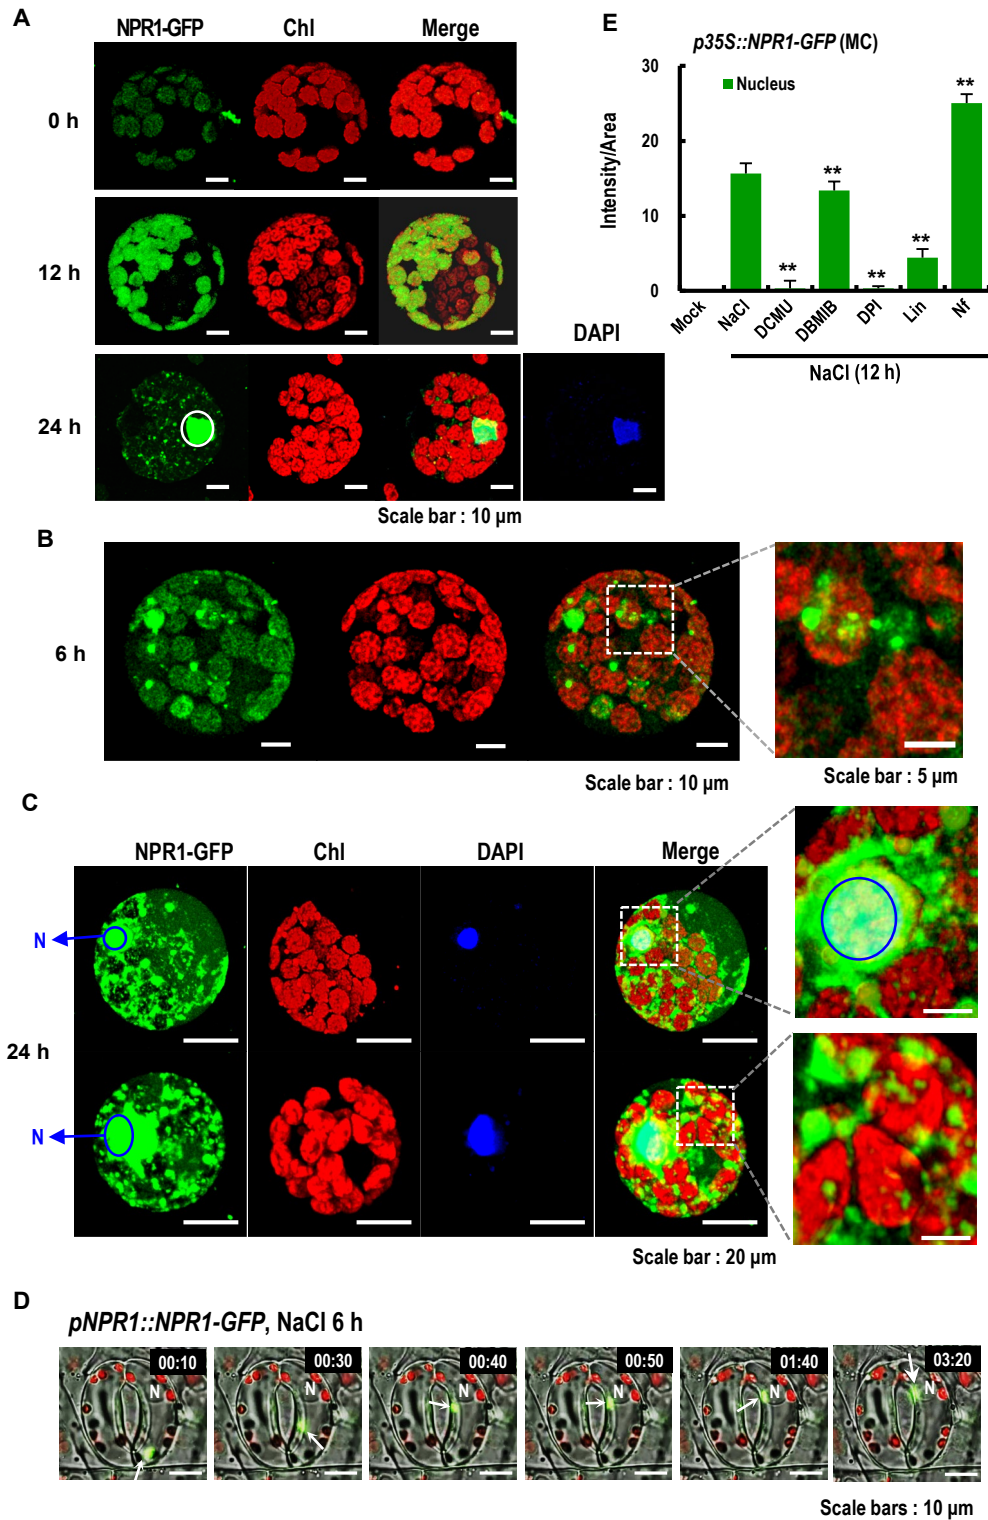



**Figure 1. Intracellular localization of GFP-tagged NPR1 in leaf cells under salt stress.**

**(A)** Confocal laser scanning microscopy (CLSM) images of GFP fluorescence in mesophyll protoplasts from 6-week-old *pNPR1::NPR1-GFP* transgenic plants after salt stress with 200 mM NaCl. Images of GFP fluorescence (green) and chlorophyll autofluorescence from chloroplasts (red) are merged in the third column. DAPI staining (blue) was in the fourth column of the last row.

**(B)** Cytoplasmic vesicles containing NPR1-GFP observed in the cytoplasmic region. NPR1-GFP is contained in green vesicles of various sizes. Cytoplasmic vesicles within the area enclosed by the dotted line are highlighted.

**(C)** Localization of NPR1-GFP in the nucleus at 24 h after salt stress treatment. Highlights of the nuclear NPR1-GFP, which is merged with autofluorescence and DAPI images (upper right). In the enlarged image, the nucleus area within the dotted line is highlighted.

**(D)** Snapshots of rapidly moving cytoplasmic vesicles containing NPR1-GFP in guard cells from the abaxial epidermis of *pNPR1::NPR1-GFP* transgenic plants at 6 h after salt stress treatment. White arrows indicate vesicles. N: nucleus.

**(E)** Fluorescence intensity of NPR1-GFP in the nucleus from *p35S::NPR1-GFP* transgenic plants under salt stress. Inhibitors were co-treated with salt stress. Inhibitors: 3-(3,4-dichlorophenyl)-1,1-dimethylurea (DCMU), 2,5-dibromo-3-methyl-6-isopropylbenzoquinone (DBMIB), diphenyliodonium (DPI), lincomycin (Lin), norflurazone (Nf). An asterisk indicates a significant difference between transformants treated with salt only and transformants co-treated with salt and other chemicals (\*\* $P < 0.01$ ).

**Figure 2.**

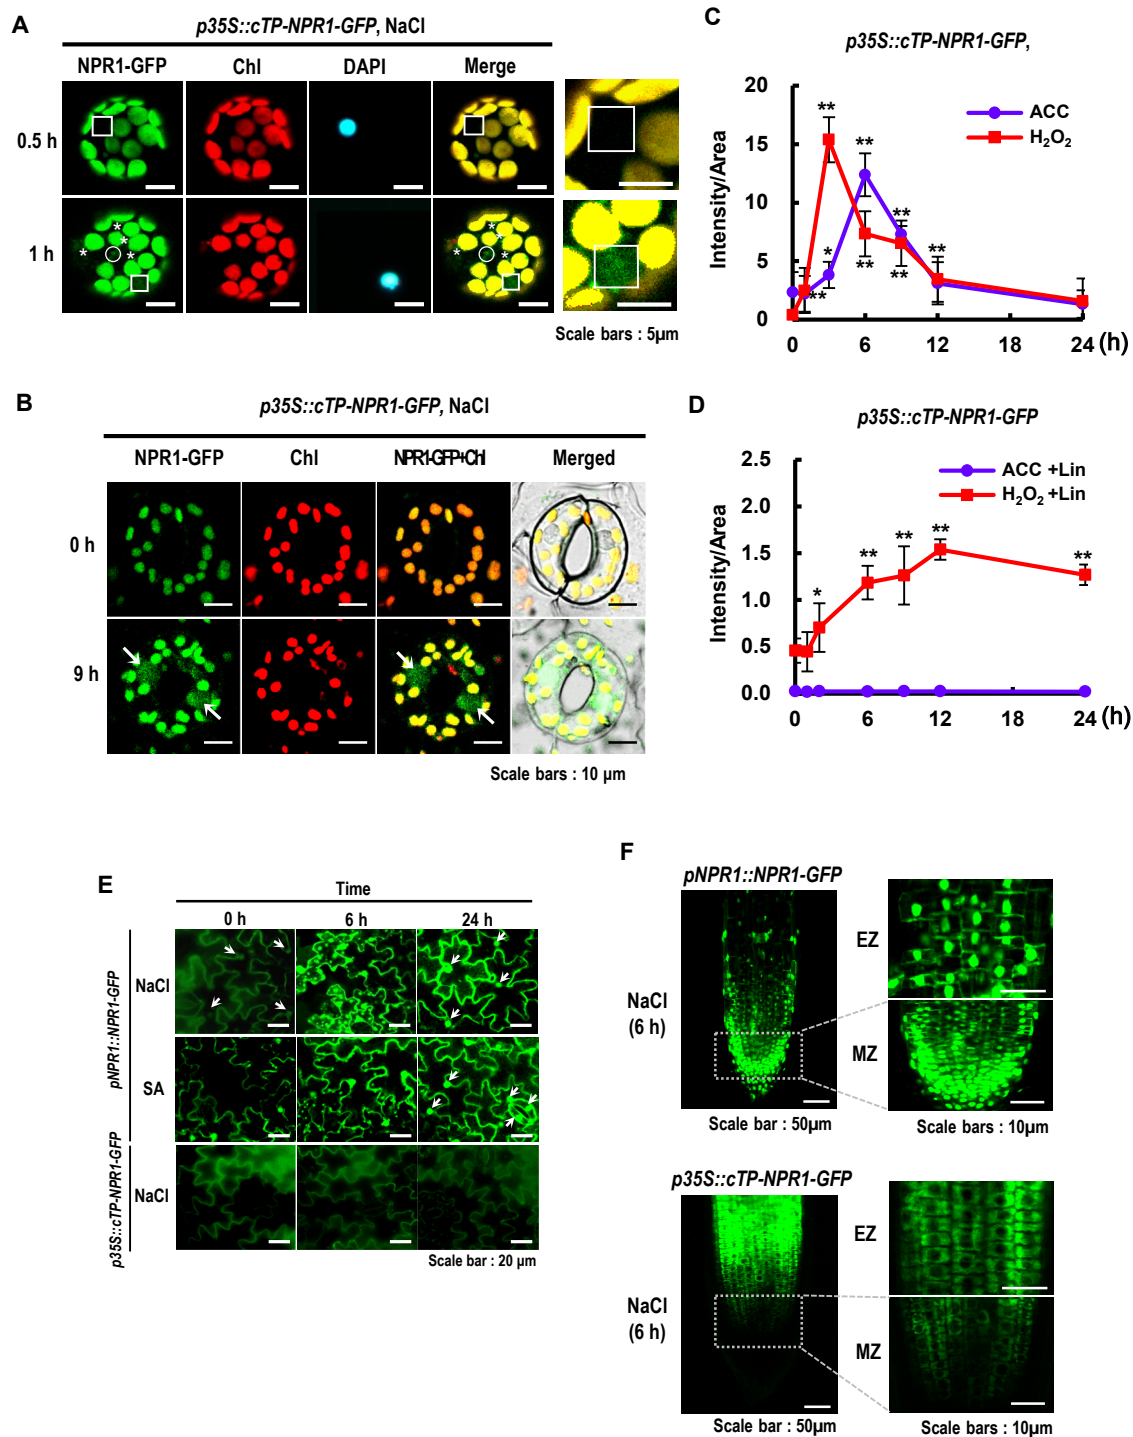

**Figure 2. Nuclear import of NPR1-GFP under salt stress.**

**(A)** CLSM images of NPR1-GFP fluorescence in salt-stressed protoplasts of *p35S::cTP-NPR1-GFP* transgenic plants. Enlarged CSLM images in the last column. White box indicates the whole nucleus. White circle and asterisk indicate cytoplasmic vesicles and chloroplast protrusions, respectively.

**(B)** CLSM images of NPR1-GFP in salt-stressed guard cells of *p35S::cTP-NPR1-GFP* transgenic plants. Arrows indicates the whole nucleus.

**(C and D)** Fluorescence intensity of GFP in the nucleus of mesophyll protoplasts from *p35S::cTP-NPR1-GFP* transgenic plants. GFP fluorescence was photographed in mesophyll protoplasts of transgenic plants after application of H<sub>2</sub>O<sub>2</sub> or ACC, and then GFP intensity was quantified in the nucleus **(C)**. After co-treatment of an inhibitor of Lincomycin (Lin) with H<sub>2</sub>O<sub>2</sub> or ACC, the GFP intensity was quantified in the nucleus of protoplasts isolated from transgenic plants **(D)**. An asterisk indicates a significant difference from 0 h (\**P* < 0.05, \*\**P* < 0.01).

**(E)** Localization of NPR1-GFP in pavement cells of the abaxial epidermis of leaves in *pNPR1::NPR1-GFP* after salt stress (upper) and SA treatment (middle) and *p35S::cTP-NPR1-GFP* after salt stress (lower). Arrows indicate NPR1 condensates.

**(F)** Localization of NPR1-GFP in intracellular compartments of roots in *pNPR1::NPR1-GFP* (upper) and *p35S::cTP-NPR1-GFP* (lower) transgenic plants under salt stress. EZ: elongation zone, MZ: meristematic zone.

**Figure 3.**

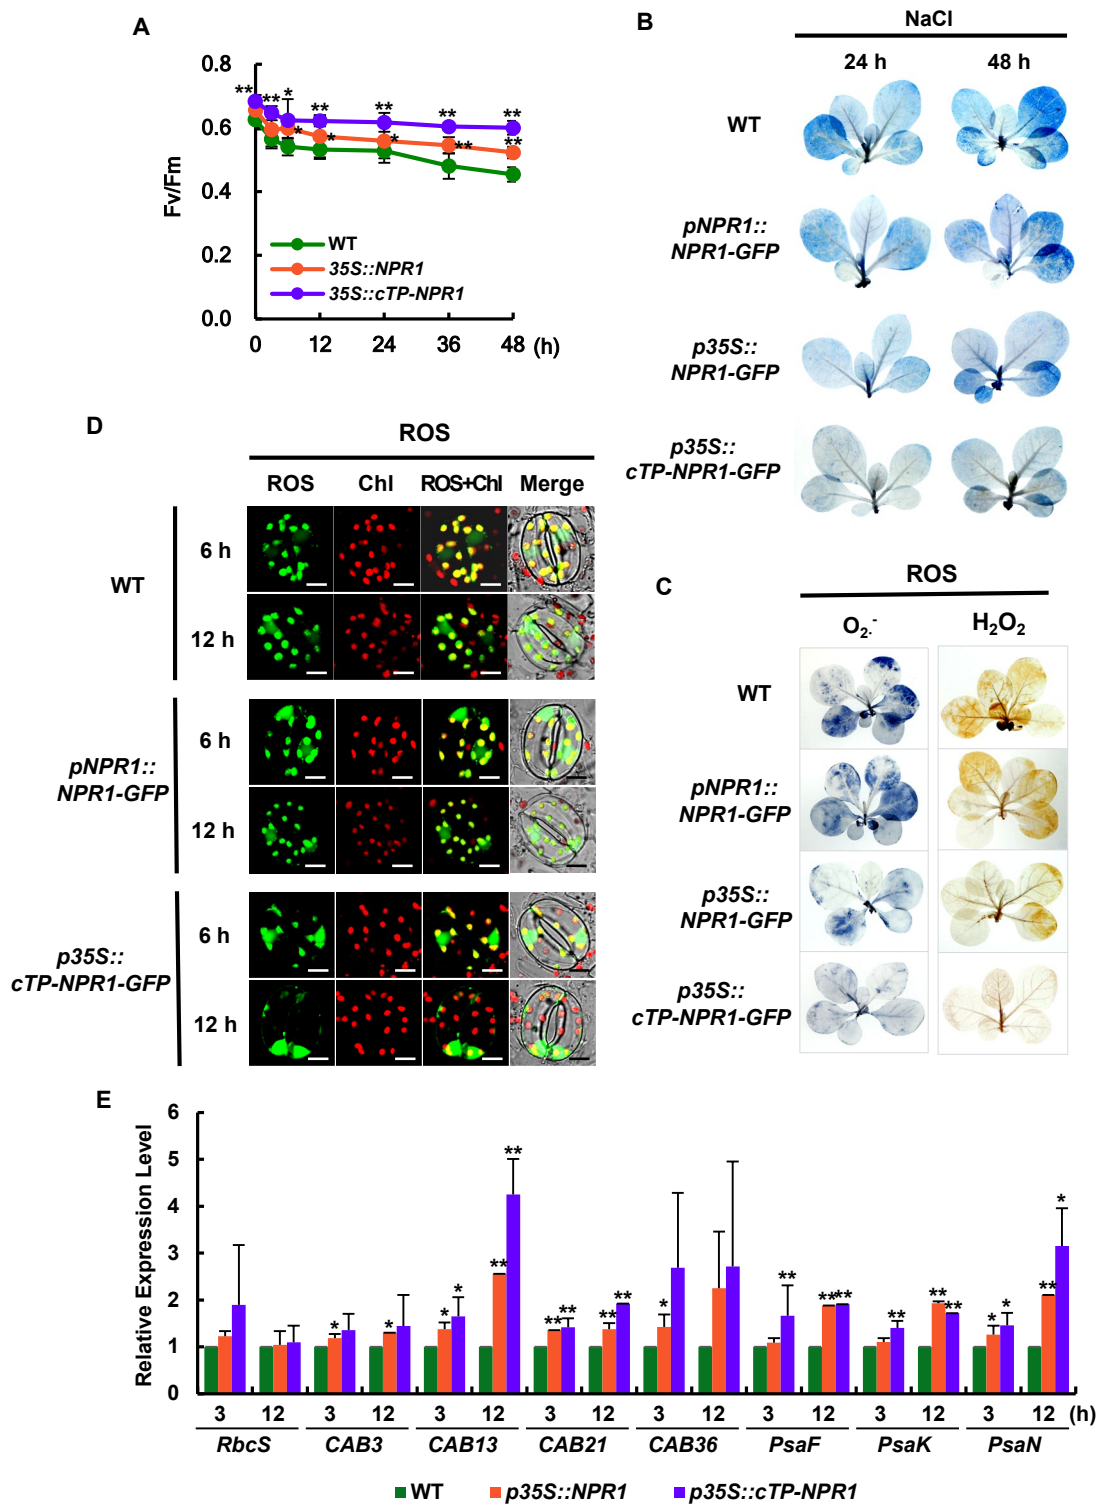

**Figure 3. Enhancement of chloroplast-targeted NPR1 in stress resistance.**

**(A)** The maximal photochemical efficiency of photosystem II ( $F_v/F_m$ ) was measured in WT, *p35S::NPR1-GFP*, and *p35S::cTP-NPR1-GFP* tobacco plants after salt stress.

**(B)** Necrotic areas in salt-stressed plants were stained with trypan blue.

**(C)** Histochemical analysis of ROS accumulation. Superoxide anion was detected by NBT staining (left), and H<sub>2</sub>O<sub>2</sub> was detected by DAB staining (right).

**(D)** Accumulation of ROS in cellular compartments of guard cells in WT and transgenic plants under salt stress. ROS was determined using CLSM after staining with 50  $\mu$ M DCFH-DA.

**(E)** Kinetics of nuclear-encoded gene transcription in WT and two transgenic plants upon salt stress. Nucleus-encoded genes: *Rbc S*, RubisCO Small subunit; *CAB3*, Chlorophyll *a/b*-binding protein 3; *CAB12*, Chlorophyll *a/b*-binding protein 12, *CAB21*, Chlorophyll *a/b*-binding protein 21; *CAB36*, Chlorophyll *a/b*-binding protein 36; *PsaF*, Photosystem I reaction center subunit III; *PsaK*, Photosystem I subunit X; *PsaN*, Photosystem I reaction center subunit XII. The relative mRNA expression levels are expressed as the mean  $\pm$  SD. An asterisk indicates a significant difference between WT and transgenic plants at an indicated time (\* $P < 0.05$ , \*\* $P < 0.01$ ).

**Figure 4.**

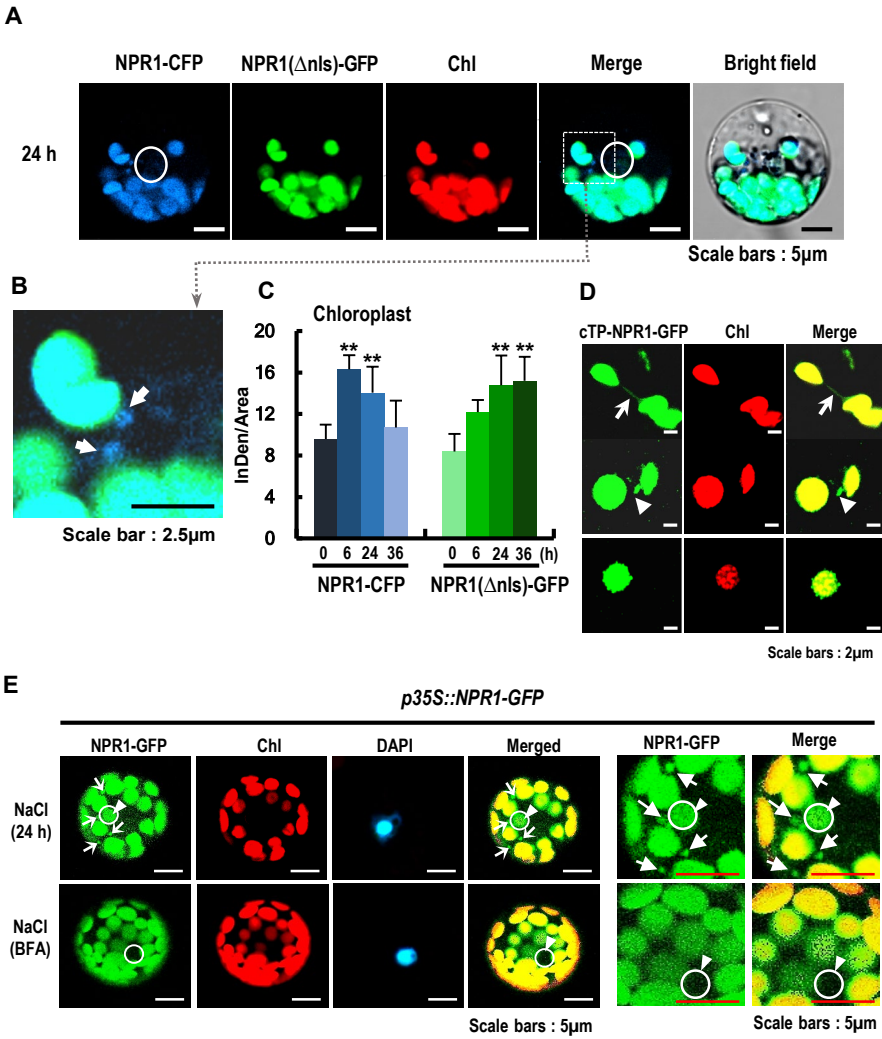



**Figure 4.** Signaling machinery from the chloroplasts to the nucleus under salt stress.

**(A and B)** CLSM images observed after co-transient expression of *p35S*-driven *GFP*-tagged *NPR1* in which the nuclear localization sequence (NLS) was deleted and *p35S*-driven *NPR1*-CFP in mesophyll protoplasts of WT at 24 h after salt stress treatment. The white circle in the merge column indicates the nucleus site, and the blue *NPR1*-CFP is weakly visible in the nucleus (**A**). The dotted gray box in the merge column shows an image of the vesicle-shaped *NPR1*-CFP protruding from the chloroplast, which is enlarged (**B**).

**(C)** Fluorescence intensity of *NPR1*-CFP (blue bar) and *NPR1*( $\Delta$ NLS)-*GFP* (green bar) in the chloroplasts after co-transient expression of both constructs. An asterisk indicates a significant difference between stress-treated or untreated cases (\*\* $P < 0.01$ ).

**(D)** CLSM images of stromules (upper row), cytoplasmic vesicles (middle row), and chloroplast protrusions (lower row) from isolated chloroplasts from *p35S::cTP-NPR1-GFP* transgenic plants under salt stress. White arrows indicate stromules and white triangles indicate chloroplast protrusions.

**(E)** CLSM images of *NPR1*-*GFP* fluorescence in salt-stressed protoplasts treated with brefeldin A (BFA, bottom). Fifth and sixth column: enlarged CSLM images. White circles indicate the whole nucleus. White arrows indicate cytoplasmic vesicles.

Figure 5.

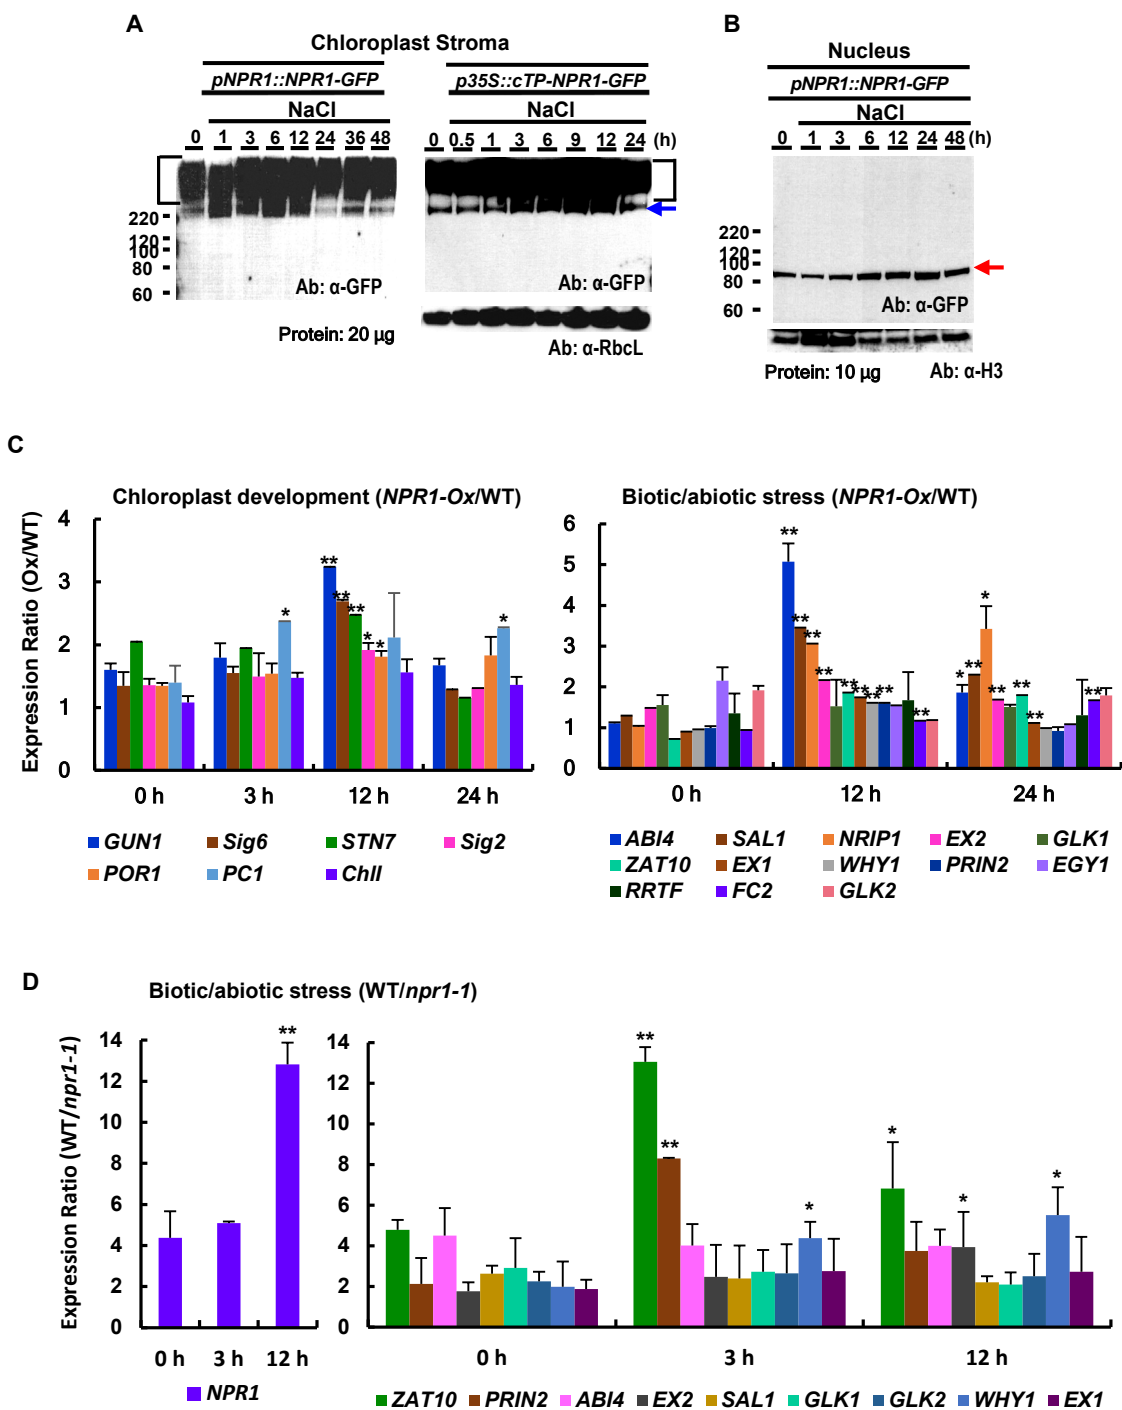

**Figure 5.** Western blot analysis of NPR1 for subcellular localization and expression analysis of retrograde signaling-related genes.

**(A and B)** Immunoblots showing NPR1-GFP in the protein fractions of chloroplast stroma **(A)** from *pNPR1::NPR1-GFP* (left) and *p35S::cTP-NPR1-GFP* (right) transgenic plants, and nucleus from *pNPR1::NPR1-GFP* **(B)** transgenic plants under salt stress by non-denatured SDS-PAGE. Oligomers (square bracket), dimeric form (blue arrow), and monomeric form (red arrow).

**(C)** Expression ratios of retrograde signaling-related genes for chloroplast development (left) and for biotic/abiotic stress (right) in *NPR1-Ox* versus wild type (WT) after salt stress.

**(D)** Expression ratios of retrograde signaling-related genes for biotic/abiotic stress in WT versus *npr1-1* mutant after salt stress treatment. The expression ratio was computed based on the relative expression level of each gene in *NPR1-Ox* versus WT **(C)** or WT versus *npr1-1* mutant **(D)** after salt stress treatment. Chloroplast development: *GUN1*, Genomes uncoupled 1; *Sig6*, Chloroplast sigma factor 6; *STN7*, Serine/threonine-protein kinase 7; *Sig2*, Chloroplast sigma factor 2; *POR1*, NADPH:protochlorophyllide oxidoreductase; *PC1*, Plastocyanin; *Chll*, Magnesium-protoporphyrin chelatase subunit. Biotic/abiotic stress: *ABI4*, Abscisic acid-insensitive protein 4; *SAL1*, 3'-phosphoadenosine 5'-phosphate phosphatase; *NRIP1*, N receptor-interacting protein; *EX2*, Executer 2; *GLK1*, Golden 2-like 1; *ZAT10*, Zinc finger transcription factor 10; *EX1*, Executer 1; *WHY1*, single-stranded DNA-binding protein WHIRLY 1; *PRIN2*, Plastid redox insensitive 2; *EGY1*, ethylene-dependent gravitropism-deficient and yellow-green 1; *RRTF*, redox responsive transcription factor; *FC2*, ferrochelatase; *GLK2*, Golden 2-like 2; *NPR1*, Nonexpressor of pathogenesis-related genes 1. An asterisk indicates a significant difference between WT and *NPR1-Ox* tobacco or *npr1-1* Arabidopsis plants at an indicated time (\* $P < 0.05$ , \*\* $P < 0.01$ ).

## Parsed Citations

- Armbruster, U., Hertle, A., Makarenko, E., Zühlke, J., Pribil, M., Dietzmann, A., Schliebner, I., Aseeva, E., Fenino, E., and Scharfenberg, M., et al. (2009). Chloroplast proteins without cleavable transit peptides: rare exceptions or a major constituent of the chloroplast proteome? *Mol. Plant* 2:1325–1335.  
Google Scholar: [Author Only](#) [Title Only](#) [Author and Title](#)
- Brigelius-Flohé, R., and Flohé, L. (2011). Basic principles and emerging concepts in the redox control of transcription factors. *Antioxid. Redox Signaling* 15:2335–2381.  
Google Scholar: [Author Only](#) [Title Only](#) [Author and Title](#)
- Brunkard, J.O., Runkel, A.M., and Zambryski, P.C. (2015). Chloroplasts extend stromules independently and in response to internal redox signals. *Proc. Natl. Acad. Sci. USA* 112: 10044–10049.  
Google Scholar: [Author Only](#) [Title Only](#) [Author and Title](#)
- Caplan, J.L. (2015). Chloroplast stromules function during innate immunity. *Dev. Cell* 34:45–57.  
Google Scholar: [Author Only](#) [Title Only](#) [Author and Title](#)
- Chan, K.X., Phua, S.Y., Crisp, P., McQuinn, R., and Pogson, B.J. (2016). Learning the Languages of the Chloroplast: Retrograde Signaling and Beyond. *Annu. Rev. Plant Biol.* 67:25–53.  
Google Scholar: [Author Only](#) [Title Only](#) [Author and Title](#)
- Després, C., Chubak, C., Rochon, A., Clark, R., Bethune, T., Desveaux, D., and Fobert, P. R. (2003). The Arabidopsis NPR1 disease resistance protein is a novel cofactor that confers redox regulation of DNA binding activity to the basic domain/leucine zipper transcription factor TGA1. *Plant Cell* 15:2181–2191.  
Google Scholar: [Author Only](#) [Title Only](#) [Author and Title](#)
- Exposito-Rodriguez, M., Laissue, P.P., Yvon-Durocher, G., and Smirnov, N. (2017). Photosynthesis-dependent H<sub>2</sub>O<sub>2</sub> transfer from chloroplasts to nuclei provides a high-light signalling mechanism. *Nat. Commun.* 8:49.  
Google Scholar: [Author Only](#) [Title Only](#) [Author and Title](#)
- Fang, X, Zhao, G., Zhang, S., Li, Y., Gu, H., Li, Y., Zhao, Q., and Qi, Y. (2019). Chloroplast-to-Nucleus Signaling Regulates MicroRNA Biogenesis in Arabidopsis. *Dev. Cell* 48:371-382.e4.  
Google Scholar: [Author Only](#) [Title Only](#) [Author and Title](#)
- Foyer, C. H., Karpinska, B., and Krupinska, K. (2014). The functions of WHIRLY1 and REDOX-RESPONSIVE TRANSCRIPTION FACTOR1 in cross tolerance responses in plants: a hypothesis. *Phil. Trans. R. Soc. B.* 369:20130226.  
Google Scholar: [Author Only](#) [Title Only](#) [Author and Title](#)
- Gläßer, C., Haberer, G., Finkemeier, I., Pfannschmidt, T., Kleine, T., Leister, D., Dietz, K.J., Häusler, R.E., Grimm, B., and Mayer, K.F. (2014). Meta-analysis of retrograde signaling in Arabidopsis thaliana reveals a core module of genes embedded in complex cellular signaling networks. *Mol. Plant* 7:1167-1190.  
Google Scholar: [Author Only](#) [Title Only](#) [Author and Title](#)
- Godoy Herz, M.A., Kubaczka, M.G., Brzyżek, G., Servi, L., Krzyszton, M., Simpson, C., Brown, J., Swiezewski, S., Petrillo, E., and Kornblihtt, A.R. (2019). Light Regulates Plant Alternative Splicing through the Control of Transcriptional Elongation. *Mol. Cell* 73:1066-1074.  
Google Scholar: [Author Only](#) [Title Only](#) [Author and Title](#)
- Hanson, M.R., and Hines, K.M. (2018). Stromules: probing formation and function. *Plant Physiol.* 176:128–137.  
Google Scholar: [Author Only](#) [Title Only](#) [Author and Title](#)
- Jung, H.S., and Mockler, T.C. (2014). A new alternative in plant retrograde signaling. *Genome Biol.* 15:117.  
Google Scholar: [Author Only](#) [Title Only](#) [Author and Title](#)
- Kim, J., and Mullet, J.E. (2003). A Mechanism for light-Induced translation of the rbcL mRNA encoding the large subunit of ribulose-1,5-bisphosphate carboxylase in barley chloroplasts. *Plant Cell Physiol.* 44:491–499.  
Google Scholar: [Author Only](#) [Title Only](#) [Author and Title](#)
- Kleine, T., and Leister, D. (2016). Retrograde signaling: Organelles go networking. *Biochim. Biophys. Acta.* 1857:1313-1325.  
Google Scholar: [Author Only](#) [Title Only](#) [Author and Title](#)
- Lin, W., Huang, D., Shi, X., Deng, B., Ren, Y., Lin, W., and Miao, Y. (2019). H<sub>2</sub>O<sub>2</sub> as a feedback signal on dual-located WHIRLY1 associates with leaf senescence in Arabidopsis. *Cells* 8:1585.  
Google Scholar: [Author Only](#) [Title Only](#) [Author and Title](#)
- Lin, W., Zhang, H., Huang, D., Schenke, D., Cai, D., Wu, B., and Miao, Y. (2020). Dual-Localized WHIRLY1 Affects Salicylic Acid Biosynthesis via Coordination of ISOCHORISMATE SYNTHASE1, PHENYLALANINE AMMONIALYASE1, and S-ADENOSYL-L-METHIONINE-DEPENDENT METHYLTRANSFERASE1. *Plant Physiol.* 184:1884-1899.  
Google Scholar: [Author Only](#) [Title Only](#) [Author and Title](#)
- Maruta, T., Noshi, M., Tanouchi, A., Tamoi, M., Yabuta, Y., Yoshimura, K., Ishikawa, T., and Shigeoka, S. (2012). H<sub>2</sub>O<sub>2</sub>-triggered retrograde signaling from chloroplasts to nucleus plays specific role in response to stress. *J. Biol. Chem.* 287:11717–11729.

- Google Scholar: [Author Only](#) [Title Only](#) [Author and Title](#)
- Mata-Pérez, C., and Spoel, S.H. (2019).** Thioredoxin-mediated redox signalling in plant immunity. *Plant Sci.* 279:27–33.  
Google Scholar: [Author Only](#) [Title Only](#) [Author and Title](#)
- Mou, Z, Fan, W., and Dong, X. (2003).** Inducers of plant systemic acquired resistance regulate NPR1 function through redox changes. *Cell* 113:935–944.  
Google Scholar: [Author Only](#) [Title Only](#) [Author and Title](#)
- Mühlenbock, P., Szechynska-Hebda, M., Plaszczyca, M., Baudo, M., Mateo, A, Mullineaux, P. M., Parker, J. E., Karpinska, B., and Karpinski, S. (2008).** Chloroplast signaling and LESION SIMULATING DISEASE1 regulate crosstalk between light acclimation and immunity in *Arabidopsis*. *Plant Cell* 20: 2339–2356.  
Google Scholar: [Author Only](#) [Title Only](#) [Author and Title](#)
- Müllineaux, P.M., Exposito-Rodriguez, M., Laissue, P.P., Smirnov, N., and Park, E. (2020).** Spatial chloroplast-to-nucleus signaling involving plastid–nuclear complexes and stromules. *Phil. Trans. R. Soc. B* 375:20190405.  
Google Scholar: [Author Only](#) [Title Only](#) [Author and Title](#)
- Munné-Bosch, S., Queval, G., and Foyer, C.H. (2013).** The impact of global change factors on redox signaling underpinning stress tolerance. *Plant Physiol.* 161:5–19.  
Google Scholar: [Author Only](#) [Title Only](#) [Author and Title](#)
- Nanjo, Y., Oka, H., Ikarashi, N., Kaneko, K., Kitajima, A, Mitsui, T., Muñoz, F.J., Rodríguez-López, M., Baroja-Fernández, E., and Pozueta-Romero, J. (2006).** Rice plastidial N-glycosylated nucleotide pyrophosphatase/phosphodiesterase is transported from the ER-golgi to the chloroplast through the secretory pathway. *Plant Cell* 18:2582–2592.  
Google Scholar: [Author Only](#) [Title Only](#) [Author and Title](#)
- Park, J.H., Tran, L.H., and Jung, S. (2017).** Perturbations in the photosynthetic pigment status result in photooxidation-Induced crosstalk between carotenoid and porphyrin biosynthetic pathways. *Front Plant Sci.* 8:1992.  
Google Scholar: [Author Only](#) [Title Only](#) [Author and Title](#)
- Petrillo, E., Godoy Herz, M.A, Fuchs, A, Reifer, D., Fuller, J., Yanovsky, M.J., Simpson, C., Brown, J.W., Barta, A, Kalyna, M., et al. (2014).** A chloroplast retrograde signal regulates nuclear alternative splicing. *Science* 344:427-430.  
Google Scholar: [Author Only](#) [Title Only](#) [Author and Title](#)
- Pfalz, J., Liebers, M., Hirth, M., Grübler, B., Holtzegel, U., Schröter, Y., Dietzel, L., and Pfannschmidt, T. (2012).** Environmental control of plant nuclear gene expression by chloroplast redox signals. *Front Plant Sci.* 3:257.  
Google Scholar: [Author Only](#) [Title Only](#) [Author and Title](#)
- Pfannschmidt, T., Terry, M.J., van Aken, O., and Quiros, P.M. (2020).** Retrograde signals from endosymbiotic organelles: a common control principle in eukaryotic cells. *Phil. Trans. R. Soc. B.* 375: 20190396.  
Google Scholar: [Author Only](#) [Title Only](#) [Author and Title](#)
- Pornsiriwong, W., Estavillo, G.M., Chan, K.X., Tee, E.E., Ganguly, D., Crisp, P.A, Phua, S.Y., Zhao, C., Qiu, J., Park, J., et al. (2017).** A chloroplast retrograde signal, 3'-phosphoadenosine 5'-phosphate, acts as a secondary messenger in abscisic acid signaling in stomatal closure and germination. *Elife* 6:e23361.  
Google Scholar: [Author Only](#) [Title Only](#) [Author and Title](#)
- Ren, Y., Li, Y., Jiang, Y., Wu, B., and Miao, Y. (2017).** Phosphorylation of WHIRLY1 by CIPK14 shifts its localization and dual functions in *Arabidopsis*. *Mol. Plant* 10:749-763.  
Google Scholar: [Author Only](#) [Title Only](#) [Author and Title](#)
- Ritzenthaler, C., Nebenführ, A, Movafeghi, A, Stussi-Garaud, C., Behnia, L., Pimpl, P., Staehelin, L.A, and Robinson, D.G. (2002).** Reevaluation of the effects of brefeldin A on plant cells using tobacco Bright Yellow 2 cells expressing Golgi-targeted green fluorescent protein and COPI antisera. *Plant Cell* 14:237–261.  
Google Scholar: [Author Only](#) [Title Only](#) [Author and Title](#)
- Selga, T., Selga, M., Gobiņš, V., and Ozoliņa, A. (2010).** Plastid-nuclear complexes: permanent structures in photosynthesizing tissues of vascular plants. *A. Env. Exp. Biol.* 8:85–92.  
Google Scholar: [Author Only](#) [Title Only](#) [Author and Title](#)
- Seo, S.Y., Wi, S.J., and Park, K.Y. (2020).** Functional switching of NPR1 between chloroplast and nucleus for adaptive response to salt stress. *Sci. Rep.* 10:4339.  
Google Scholar: [Author Only](#) [Title Only](#) [Author and Title](#)
- Smirnov, N., and Arnaud, D. (2019).** Hydrogen peroxide metabolism and functions in plants. *New Phytol.* 221:1197–1214.  
Google Scholar: [Author Only](#) [Title Only](#) [Author and Title](#)
- Spoel, S.H., Mou, Z, Tada, Y., Spivey, N.W., Genschik, P., and Dong, X. (2009).** Proteasome-mediated turnover of the transcription coactivator NPR1 plays dual roles in regulating plant immunity. *Cell* 137:860–872.  
Google Scholar: [Author Only](#) [Title Only](#) [Author and Title](#)
- Świda-Barteczka, A, Krieger-Liszczay, A, Bilger, W., Voigt, U., Hensel, G., Szweykowska-Kulinska, Z, and Krupinska, K. (2018).** The plastid-nucleus located DNA/RNA binding protein WHIRLY1 regulates microRNA-levels during stress in barley (*Hordeum vulgare* L.).

**RNA Biol. 15:886-891.**

Google Scholar: [Author Only](#) [Title Only](#) [Author and Title](#)

**Tada, Y., Spoel, S. H., Pajerowska-Mukhtar, K., Mou, Z., Song, J., Wang, C., Zuo, J., and Dong, X. (2008). Plant immunity requires conformational changes of NPR1 via S-nitrosylation and thioredoxins. *Science* 321:952–956.**

Google Scholar: [Author Only](#) [Title Only](#) [Author and Title](#)

**van der Reest, J., Lilla, S., Zheng, L., Zanivan, S., and Gottlieb, S.E. (2018). Proteome-wide analysis of cysteine oxidation reveals metabolic sensitivity to redox stress. *Nat Commun.* 9:1581.**

Google Scholar: [Author Only](#) [Title Only](#) [Author and Title](#)

**van Eerden, F.J., Melo, M.N., Frederix, P.W.J.M., Periole, X., and Marrink, S.J. (2017). Exchange pathways of plastoquinone and plastoquinol in the photosystem II complex. *Nat. Commun.* 8:15214.**

Google Scholar: [Author Only](#) [Title Only](#) [Author and Title](#)

**Wu, S.J., and Park, K.Y. (2002). Antisense expression of carnation cDNA encoding ACC synthase or ACC oxidase enhances polyamine content and abiotic stress tolerance in transgenic tobacco plants. *Mol. Cells* 13:209–220.**

Google Scholar: [Author Only](#) [Title Only](#) [Author and Title](#)

**Wu, G.Z., Meyer, E.H., Richter, A.S., Schuster, M., Ling, Q., Schöttler, M.A., Walther, D., Zoschke, R., Grimm, B., Jarvis, R.P., et al. (2019). Control of retrograde signalling by protein import and cytosolic folding stress. *Nat. Plants* 5:525–538.**

Google Scholar: [Author Only](#) [Title Only](#) [Author and Title](#)

**Xiao, Y., Savchenko, T., Baidoo, E.E., Chehab, W.E., Hayden, D.M., Tolstikov, V., Corwin, J.A., Kliebenstein, D.J., Keasling, J.D., and Dehesh, K. (2012). Retrograde signaling by the plastidial metabolite MEcPP regulates expression of nuclear stress-response genes. *Cell* 149:1525-1535.**

Google Scholar: [Author Only](#) [Title Only](#) [Author and Title](#)

**Yan, X., Khan, S., Hase, T., Emes, M.J., and Bowsher, C.G. (2006). Differential uptake of photosynthetic and non-photosynthetic proteins by pea root plastids. *FEBS Lett.* 580: 6509–6512.**

Google Scholar: [Author Only](#) [Title Only](#) [Author and Title](#)

**Zavaliev, R., Mohan, R., Chen, T., and Dong, X. (2020). Formation of NPR1 condensates promotes cell survival during the plant immune response. *Cell* 182:1093–1108.**

Google Scholar: [Author Only](#) [Title Only](#) [Author and Title](#)

**Zhao, C., Wang, Y., Chan, K.X., Marchant, D.B., Franks, P.J., Randall, D., Tee, E.E., Chen, G., Ramesh, S., Phua, S.Y., et al. (2019a). Evolution of chloroplast retrograde signaling facilitates green plant adaptation to land. *Proc. Natl. Acad. Sci. USA* 116:5015-5020.**

Google Scholar: [Author Only](#) [Title Only](#) [Author and Title](#)

**Zhao, X., Huang, J., and Chory, J. (2019b). GUN1 interacts with MORF2 to regulate plastid RNA editing during retrograde signaling. *Proc. Natl. Acad. Sci. USA* 116:10162-10167.**

Google Scholar: [Author Only](#) [Title Only](#) [Author and Title](#)

**Zhao, X., Huang, J., and Chory, J. (2020). Unraveling the Linkage between Retrograde Signaling and RNA Metabolism in Plants. *Trends Plant Sci.* 25:141-147.**

Google Scholar: [Author Only](#) [Title Only](#) [Author and Title](#)
